# Supplementary material for: The Effect of Slow-Paced Breathing on Cardiovascular and Emotion Functions: A Meta-Analysis and Systematic Review
Source: Springer Nature journal article supplement (doi:10.1007/s12671-023-02294-2), 2024-01-01

**The Effect of Slow-Paced Breathing on Cardiovascular and Emotion Functions: A Meta-Analysis and Systematic Review**

*Supplementary Materials*

**Table S1.** PRISMA Checklist

| **Section and Topic** | **Item #** | **Checklist item** | **Location where item is reported** |
| --- | --- | --- | --- |
| **TITLE** | | |  |
| Title | 1 | Identify the report as a systematic review. | p.1, 4 |
| **ABSTRACT** | | |  |
| Abstract | 2 | See the PRISMA 2020 for Abstracts checklist. | p.1 |
| **INTRODUCTION** | | |  |
| Rationale | 3 | Describe the rationale for the review in the context of existing knowledge. | p.2-4 |
| Objectives | 4 | Provide an explicit statement of the objective(s) or question(s) the review addresses. | p.4 |
| **METHODS** | | |  |
| Eligibility criteria | 5 | Specify the inclusion and exclusion criteria for the review and how studies were grouped for the syntheses. | p.5 |
| Information sources | 6 | Specify all databases, registers, websites, organisations, reference lists and other sources searched or consulted to identify studies. Specify the date when each source was last searched or consulted. | p.5 |
| Search strategy | 7 | Present the full search strategies for all databases, registers and websites, including any filters and limits used. | p.5 |
| Selection process | 8 | Specify the methods used to decide whether a study met the inclusion criteria of the review, including how many reviewers screened each record and each report retrieved, whether they worked independently, and if applicable, details of automation tools used in the process. | p.5-6 |
| Data collection process | 9 | Specify the methods used to collect data from reports, including how many reviewers collected data from each report, whether they worked independently, any processes for obtaining or confirming data from study investigators, and if applicable, details of automation tools used in the process. | p.6-8 |
| Data items | 10a | List and define all outcomes for which data were sought. Specify whether all results that were compatible with each outcome domain in each study were sought (e.g. for all measures, time points, analyses), and if not, the methods used to decide which results to collect. | p.6-8 |
| 10b | List and define all other variables for which data were sought (e.g. participant and intervention characteristics, funding sources). Describe any assumptions made about any missing or unclear information. | p.6-8 |
| Study risk of bias assessment | 11 | Specify the methods used to assess risk of bias in the included studies, including details of the tool(s) used, how many reviewers assessed each study and whether they worked independently, and if applicable, details of automation tools used in the process. | p.7 |
| Effect measures | 12 | Specify for each outcome the effect measure(s) (e.g. risk ratio, mean difference) used in the synthesis or presentation of results. | p.8-10 |
| Synthesis methods | 13a | Describe the processes used to decide which studies were eligible for each synthesis (e.g. tabulating the study intervention characteristics and comparing against the planned groups for each synthesis (item #5)). | Table S3 |
| 13b | Describe any methods required to prepare the data for presentation or synthesis, such as handling of missing summary statistics, or data conversions. | p.8-10 |
| 13c | Describe any methods used to tabulate or visually display results of individual studies and syntheses. | p.8-10 |
| 13d | Describe any methods used to synthesize results and provide a rationale for the choice(s). If meta-analysis was performed, describe the model(s), method(s) to identify the presence and extent of statistical heterogeneity, and software package(s) used. | p.8-10 |
| 13e | Describe any methods used to explore possible causes of heterogeneity among study results (e.g. subgroup analysis, meta-regression). | p.9-10 |
| 13f | Describe any sensitivity analyses conducted to assess robustness of the synthesized results. | N/A |
| Reporting bias assessment | 14 | Describe any methods used to assess risk of bias due to missing results in a synthesis (arising from reporting biases). | p.7 |
| Certainty assessment | 15 | Describe any methods used to assess certainty (or confidence) in the body of evidence for an outcome. | p.8-10 |
| **RESULTS** | | |  |
| Study selection | 16a | Describe the results of the search and selection process, from the number of records identified in the search to the number of studies included in the review, ideally using a flow diagram. | Figure 1  p.10 |
| 16b | Cite studies that might appear to meet the inclusion criteria, but which were excluded, and explain why they were excluded. | Table S2 |
| Study characteristics | 17 | Cite each included study and present its characteristics. | Table S3 |
| Risk of bias in studies | 18 | Present assessments of risk of bias for each included study. | p.7 |
| Results of individual studies | 19 | For all outcomes, present, for each study: (a) summary statistics for each group (where appropriate) and (b) an effect estimate and its precision (e.g. confidence/credible interval), ideally using structured tables or plots. | p.10-15  Table 1 |
| Results of syntheses | 20a | For each synthesis, briefly summarise the characteristics and risk of bias among contributing studies. | p.10-15 |
| 20b | Present results of all statistical syntheses conducted. If meta-analysis was done, present for each the summary estimate and its precision (e.g. confidence/credible interval) and measures of statistical heterogeneity. If comparing groups, describe the direction of the effect. | p.10-15 |
| 20c | Present results of all investigations of possible causes of heterogeneity among study results. | p.10-15 |
| 20d | Present results of all sensitivity analyses conducted to assess the robustness of the synthesized results. | N/A |
| Reporting biases | 21 | Present assessments of risk of bias due to missing results (arising from reporting biases) for each synthesis assessed. | Figure S1-S15 |
| Certainty of evidence | 22 | Present assessments of certainty (or confidence) in the body of evidence for each outcome assessed. | p.10-15 |
| **DISCUSSION** | | |  |
| Discussion | 23a | Provide a general interpretation of the results in the context of other evidence. | p.16-21 |
| 23b | Discuss any limitations of the evidence included in the review. | p.20 |
| 23c | Discuss any limitations of the review processes used. | p.20 |
| 23d | Discuss implications of the results for practice, policy, and future research. | p.16-21 |
| **OTHER INFORMATION** | | |  |
| Registration and protocol | 24a | Provide registration information for the review, including register name and registration number, or state that the review was not registered. | p.5 |
| 24b | Indicate where the review protocol can be accessed, or state that a protocol was not prepared. | p.5 |
| 24c | Describe and explain any amendments to information provided at registration or in the protocol. | N/A |
| Support | 25 | Describe sources of financial or non-financial support for the review, and the role of the funders or sponsors in the review. | N/A |
| Competing interests | 26 | Declare any competing interests of review authors. | N/A |
| Availability of data, code and other materials | 27 | Report which of the following are publicly available and where they can be found: template data collection forms; data extracted from included studies; data used for all analyses; analytic code; any other materials used in the review. | N/A |

**Table S2.** Inclusion/exclusion criteria for screening

|  | Inclusion criteria | Exclusion criteria |
| --- | --- | --- |
| Population | Non-clinical adult samples naïve to breathing techniques | Children and adolescents  Clinical samples with records of diagnosed psychiatric, neurological or major physical disorders (cardiovascular or endocrinological)  Pregnant women  Special populations (e.g., high-altitude populations)  Experts in breathing techniques (i.e., experienced pranayama/Qigong practitioners) |
| Intervention | Slow-paced breathing interventions involving voluntary control of the breath to a specific pace (≤ 10 breaths/min)  Duration of intervention must be ≥ 5 mins long | Paced breathing interventions set above 10 breaths/min  Interventions that primarily focus on breathing awareness and/or those which do not actively modulate breathing rate  Mixed-technique interventions (e.g., paced breathing delivered in conjunction with mindfulness practices)  Concurrent stressors (e.g., cold pressor test) |
| Comparison | Comparisons with a different intervention, no intervention or baseline | No Comparison |
| Outcomes | Cardiovascular outcomes (HR, time- and frequency-domain HRV, SBP, DBP), emotional state measures (assessed with psychometric scales/questionnaires)  Measured during or immediately after paced breathing interventions | No physiological measures of interest |
| Study characteristic | Within subjects, pre-post, randomised controlled studies | Case reports, literature reviews, meta-analyses, observational studies, and study protocols  Articles published before 1980  No full-text available  Not written in English |

**Supplementary Figure S1.** (a) Forest plot of effect sizes and (b) funnel plot for included studies investigating heart rate at baseline (TPRE) and following intervention (TPOST).

a)


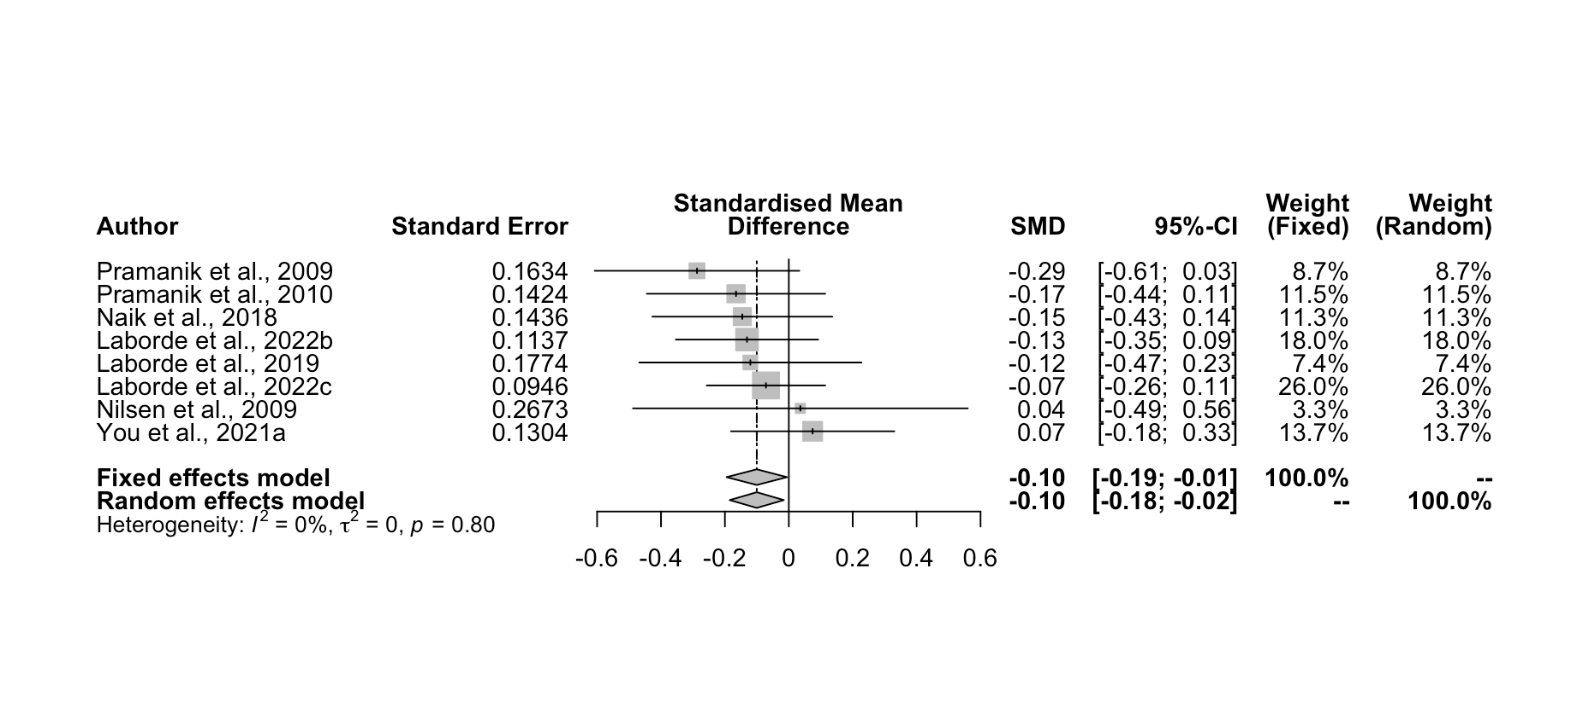


b)


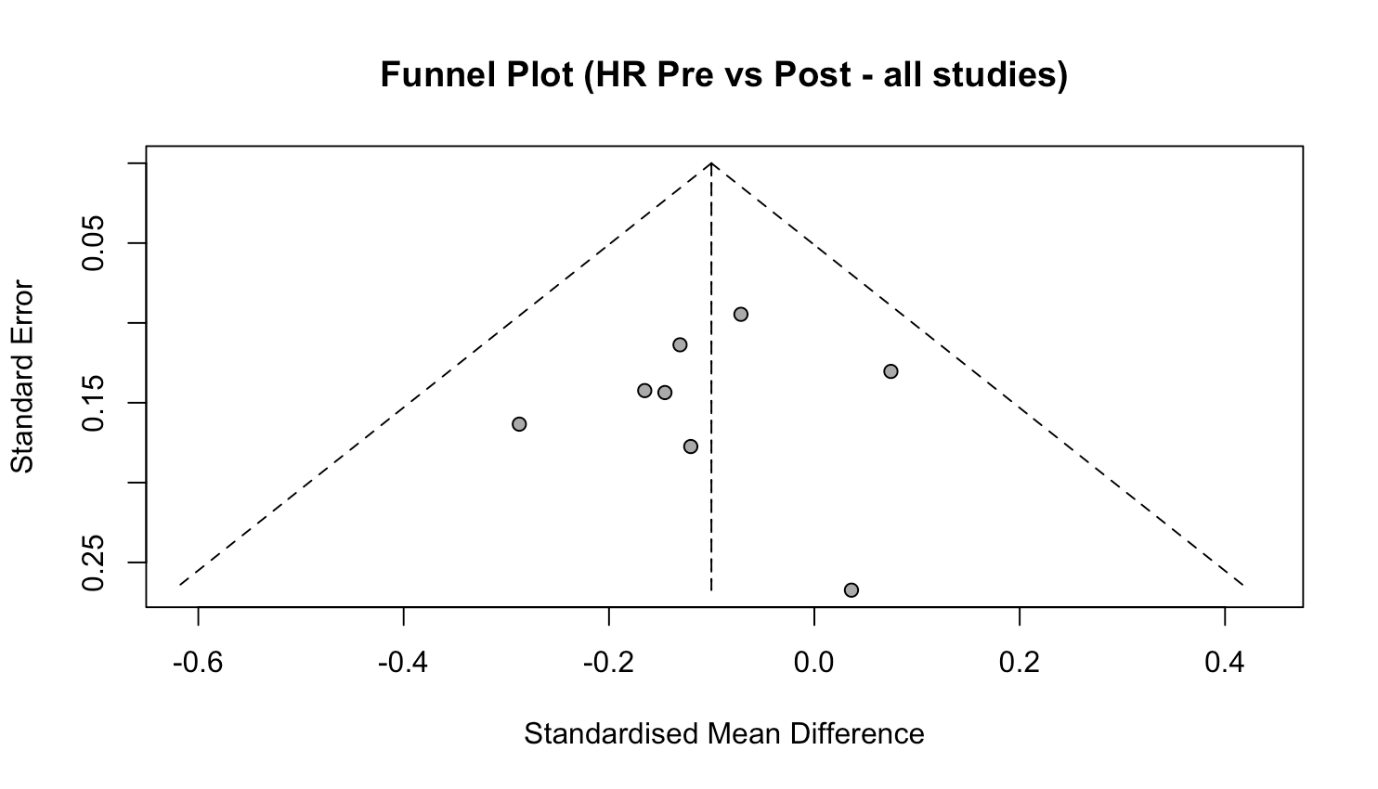


**Supplementary Figure S2.** (a) Forest plot of effect sizes and (b) funnel plot for included studies investigating heart rate at baseline (TPRE) and during intervention (TINTERVENTION).

a)


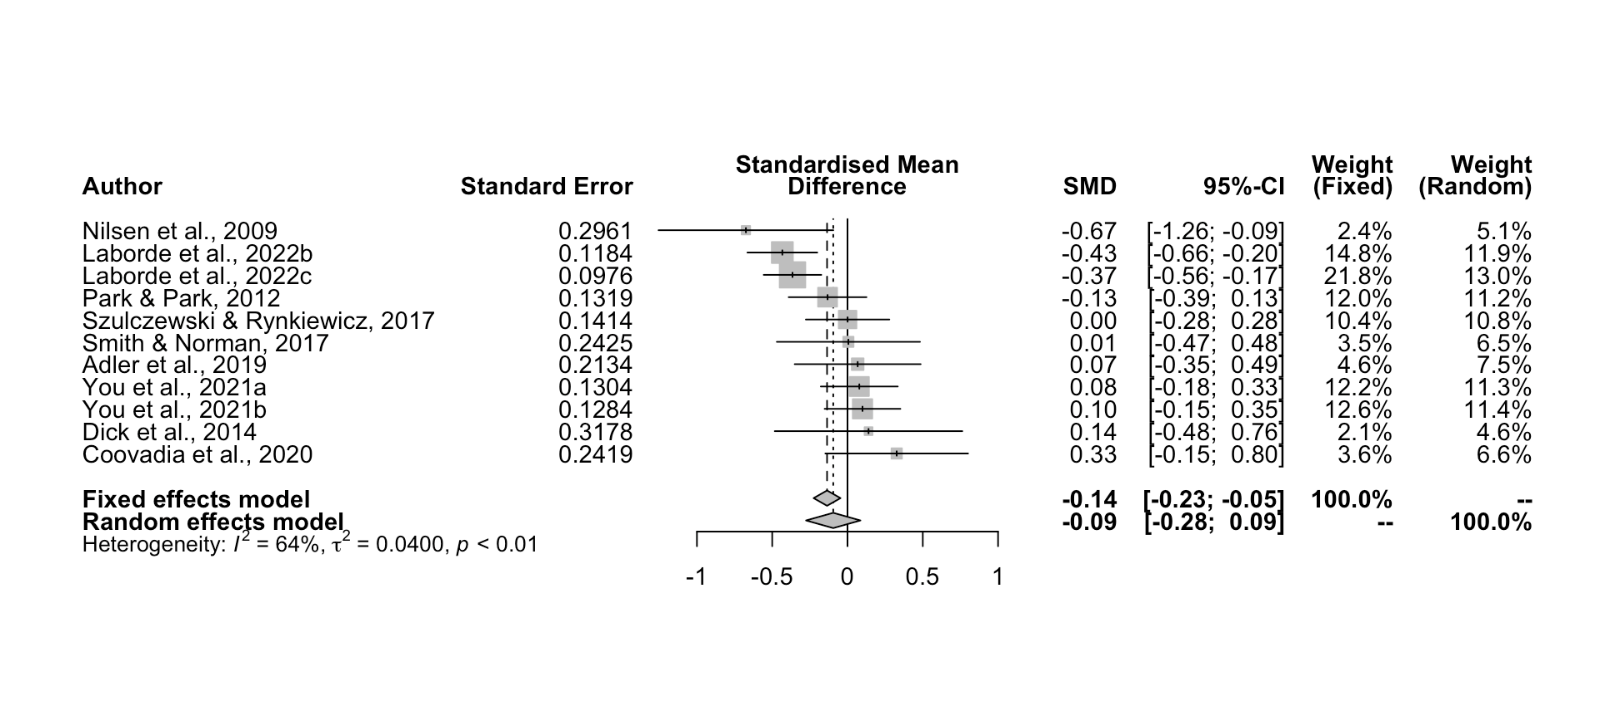


b)


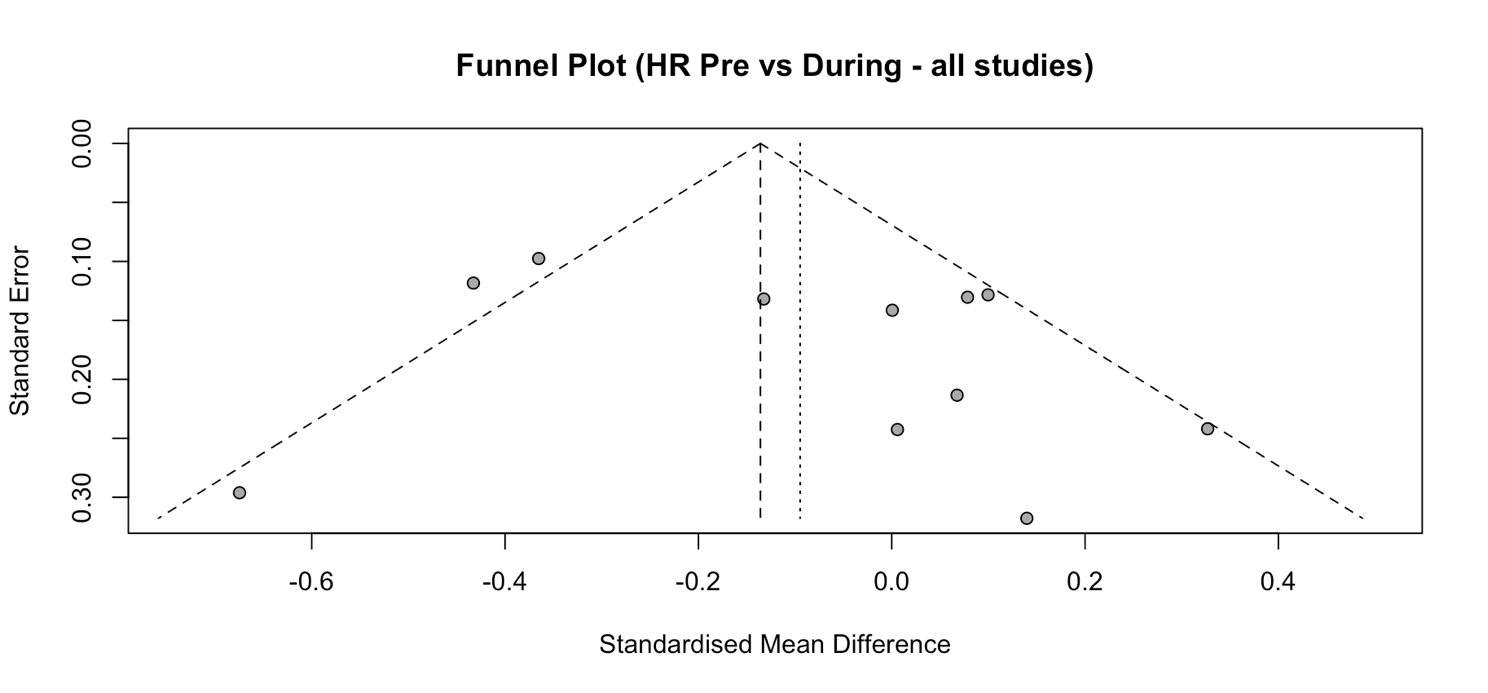


**Supplementary Figure S3.** (a) Forest plot of effect sizes and (b) funnel plot for included studies investigating RMSSD at baseline (TPRE) and following intervention (TPOST).

a)


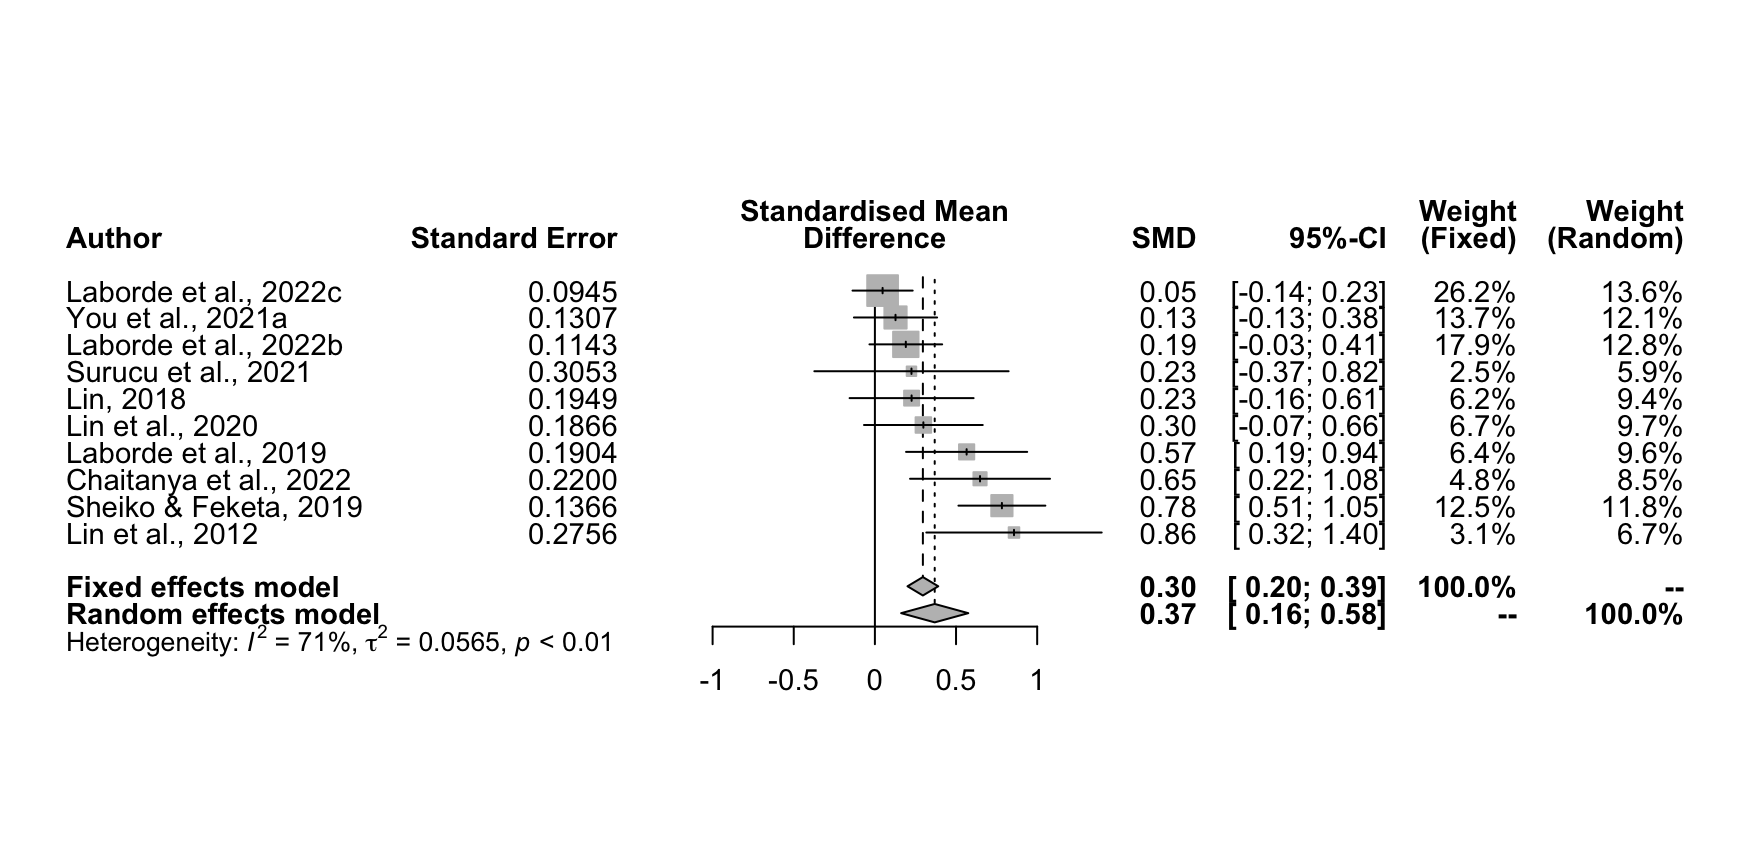


b)


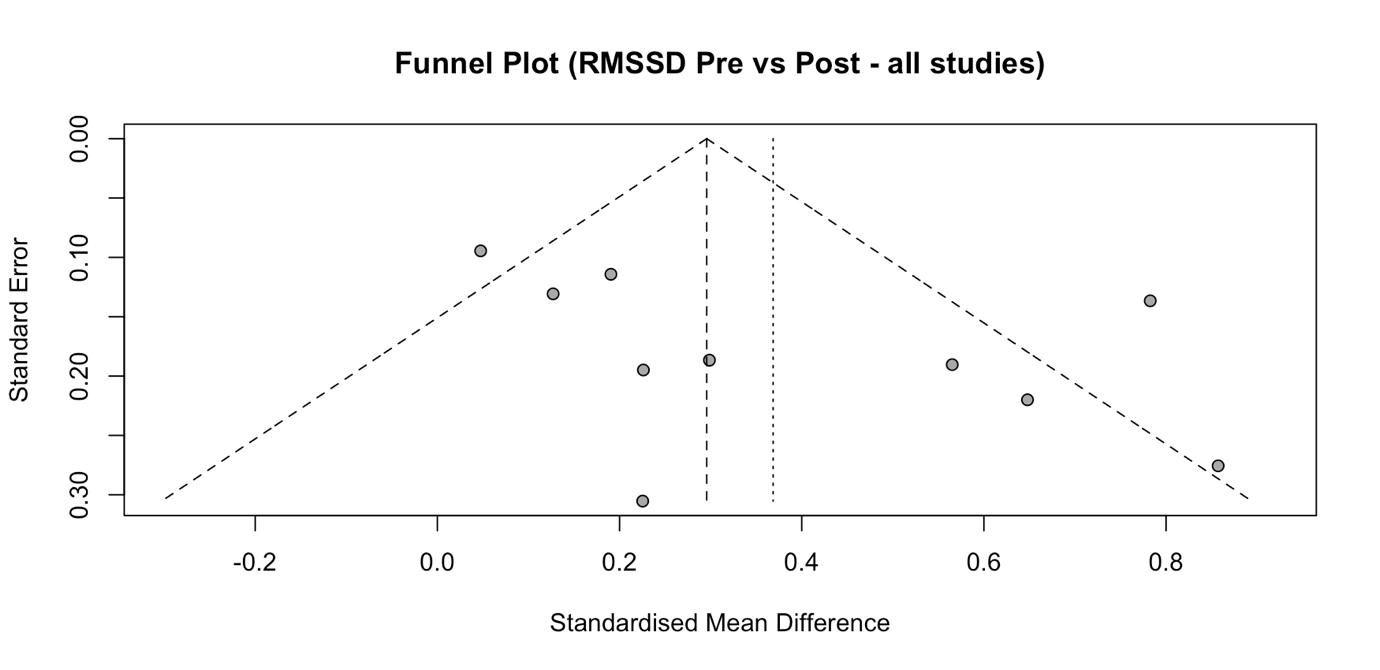


**Supplementary Figure S4.** (a) Forest plot of effect sizes and (b) funnel plot for all included studies investigating heart rate at baseline (TPRE) and during intervention (TINTERVENTION). (c) Forest plot of effect sizes after removing outliers (TPRE vs TINTERVENTION).

a)

**
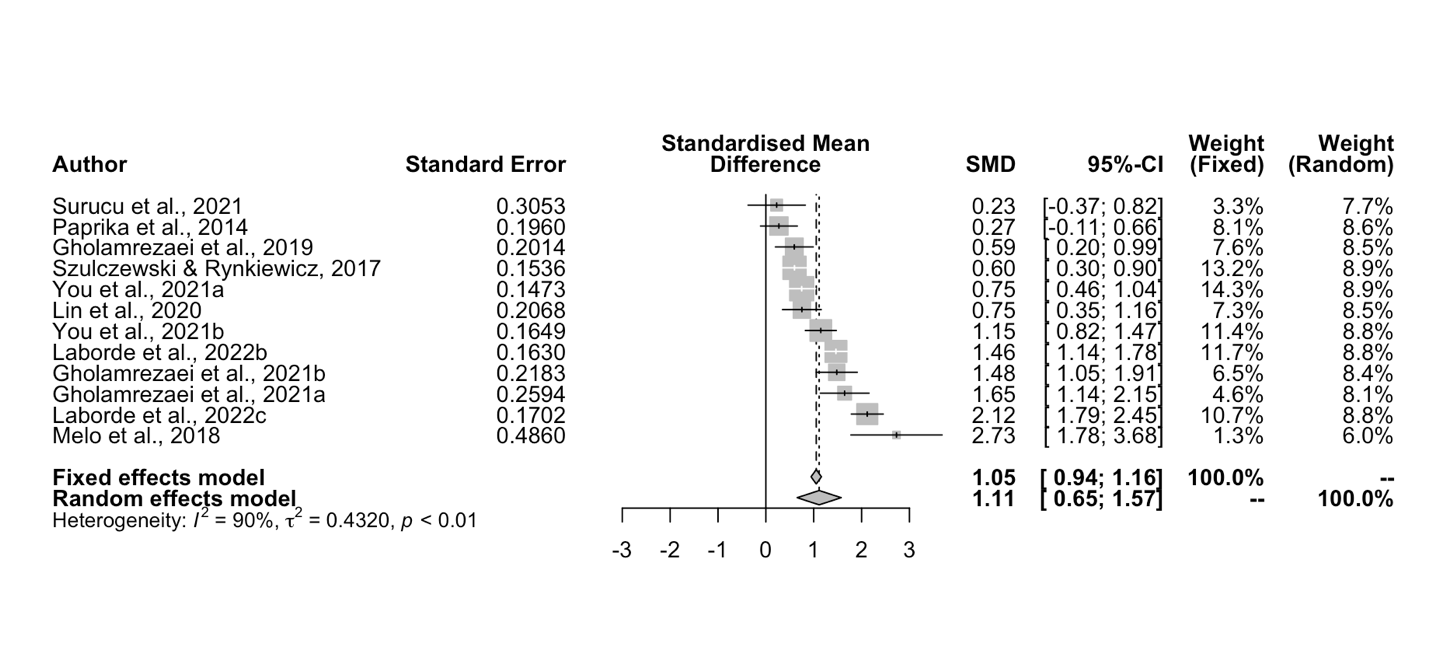
**

b)

**
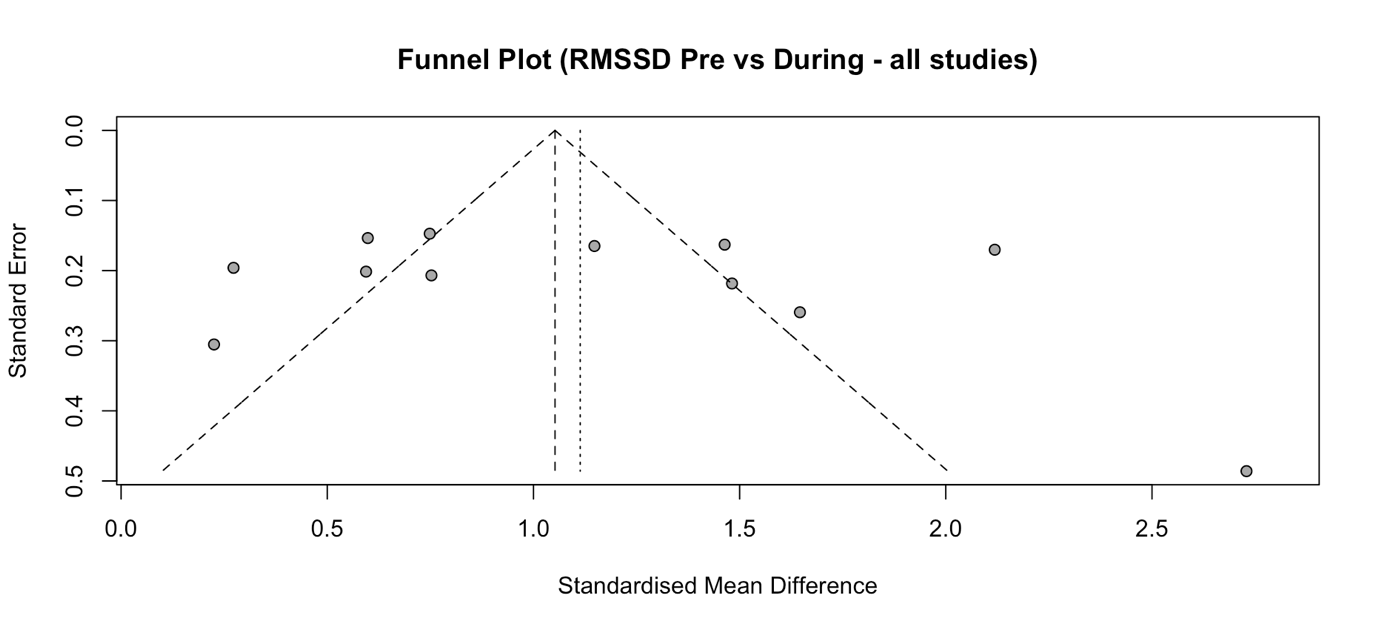
**

c)


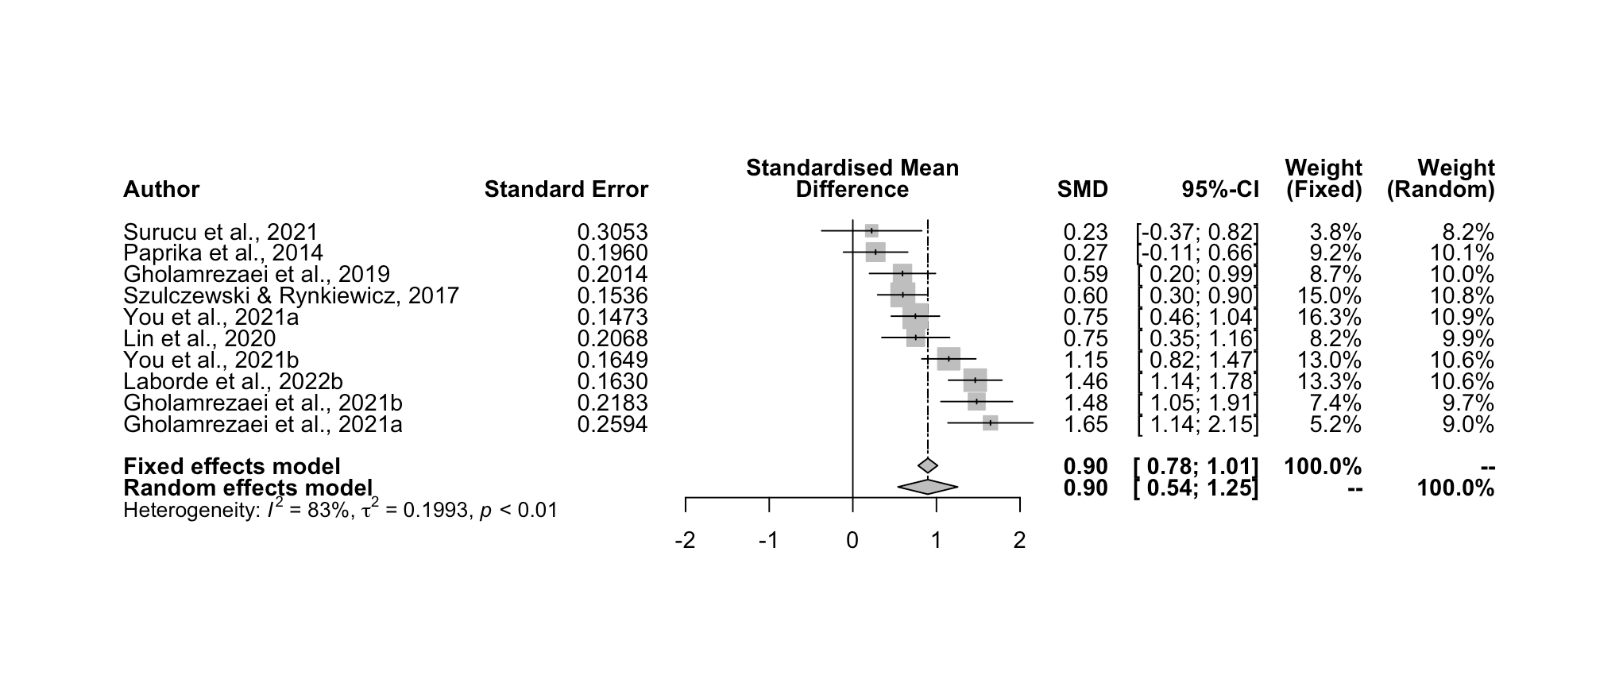


**Supplementary Figure S5.** (a) Forest plot of effect sizes and (b) funnel plot for included studies investigating SDNN at baseline (TPRE) and following intervention (TPOST).

a)


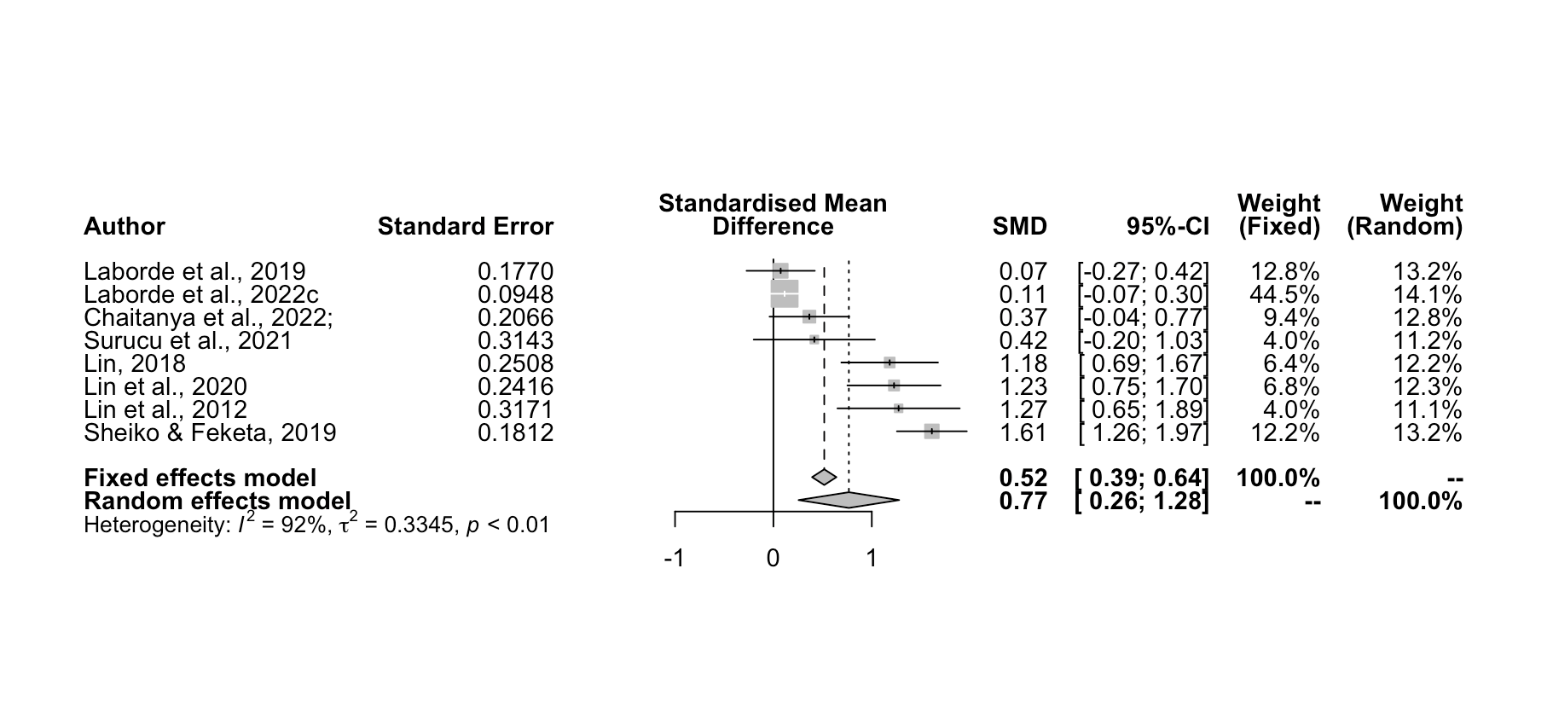


b)


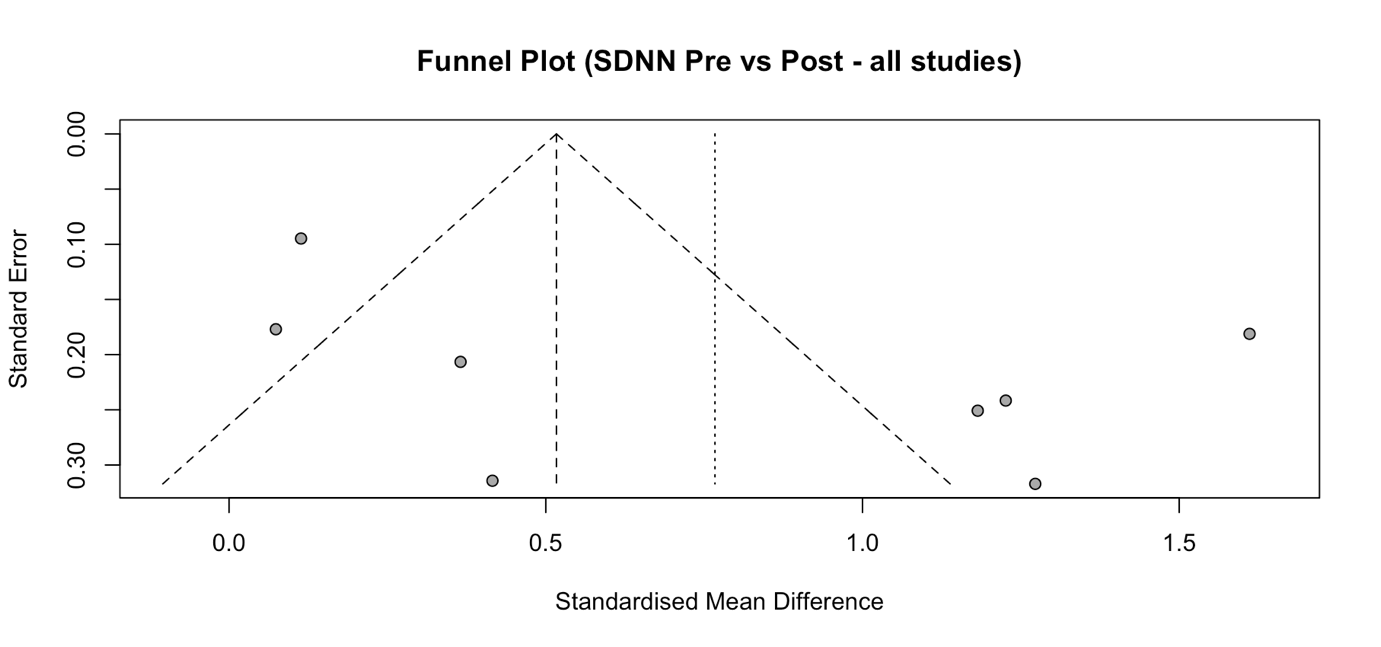


**Supplementary Figure S6.** (a) Forest plot of effect sizes and (b) funnel plot for all included studies investigating SDNN at baseline (TPRE) and during intervention (TINTERVENTION).

a)


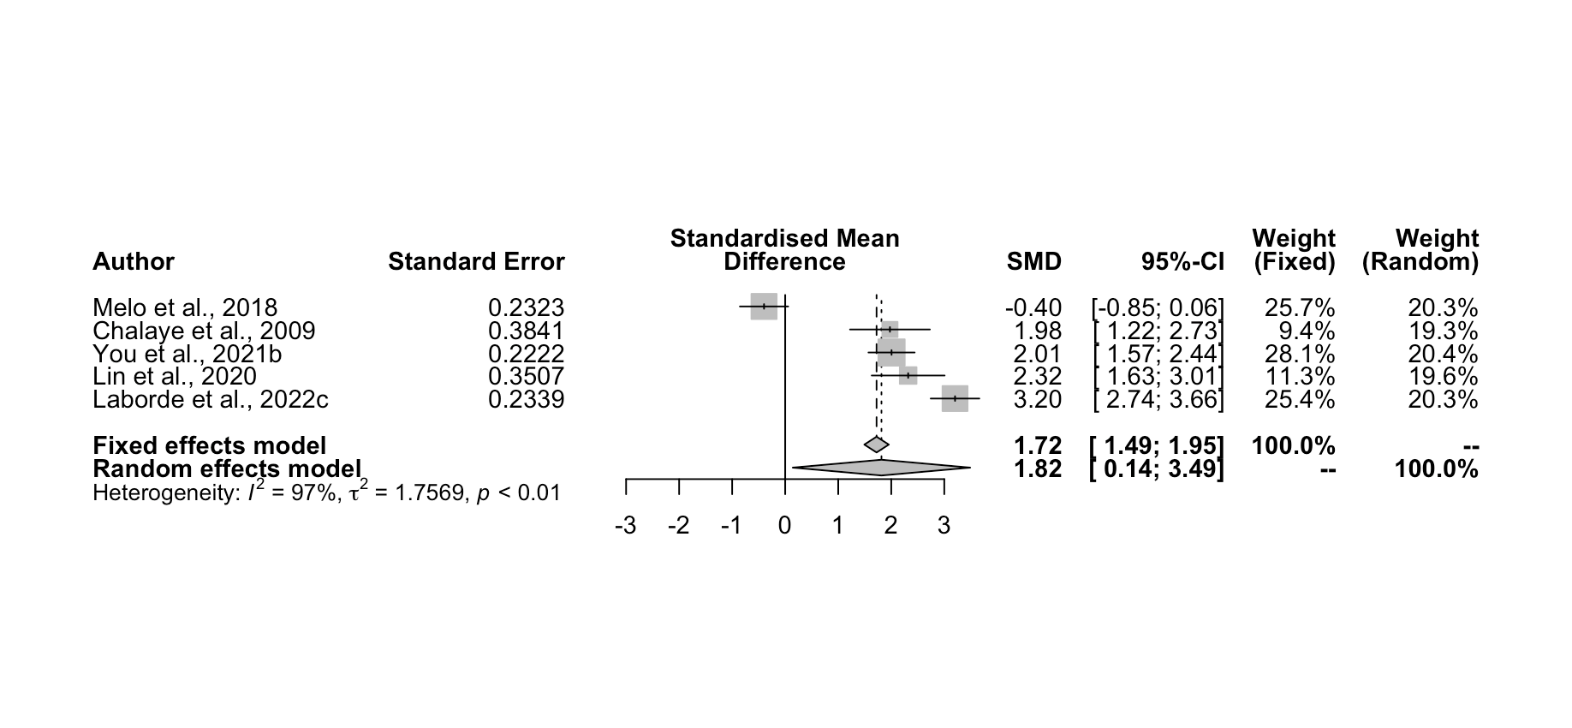


b)


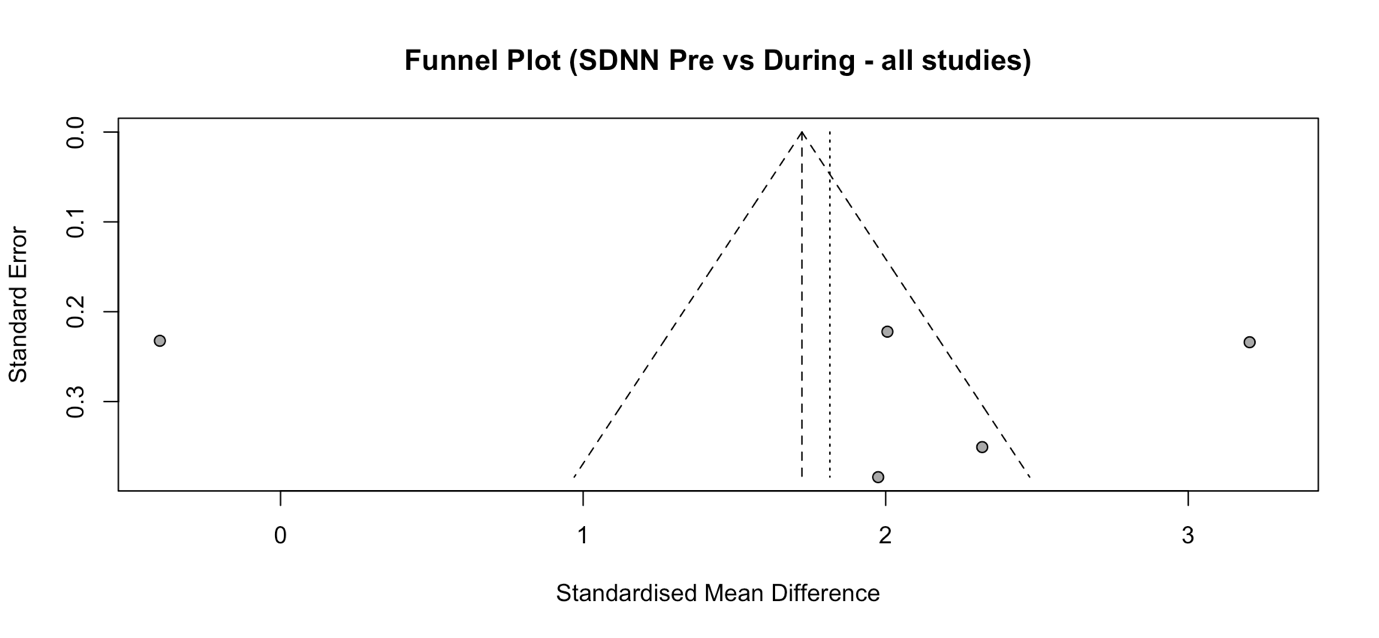


**Supplementary Figure S7.** (a) Forest plot of effect sizes and (b) funnel plot for included studies investigating LF-HRV ratio at baseline (TPRE) and following intervention (TPOST).

(c) Forest plot of effect sizes after removing outliers (TPRE vs TPOST).

a)


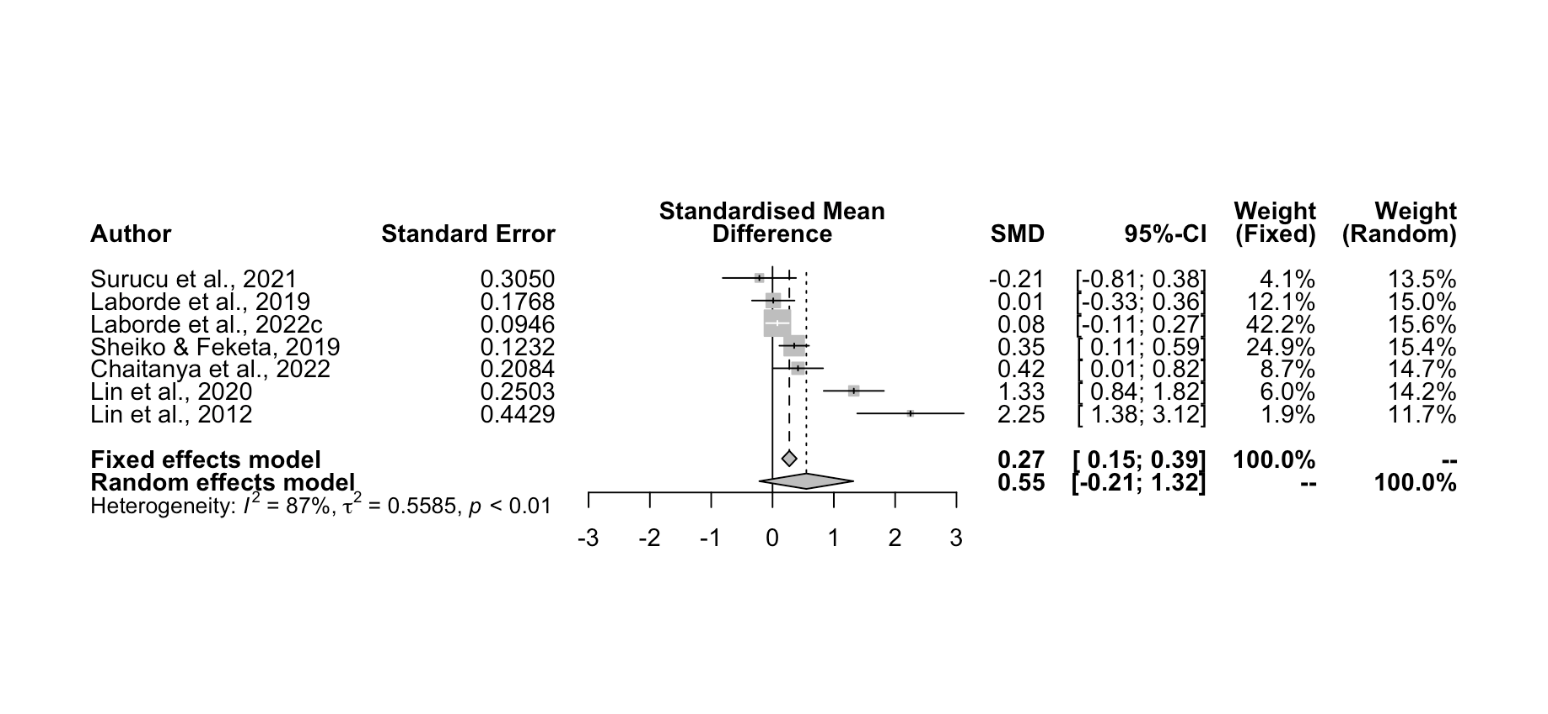


b)


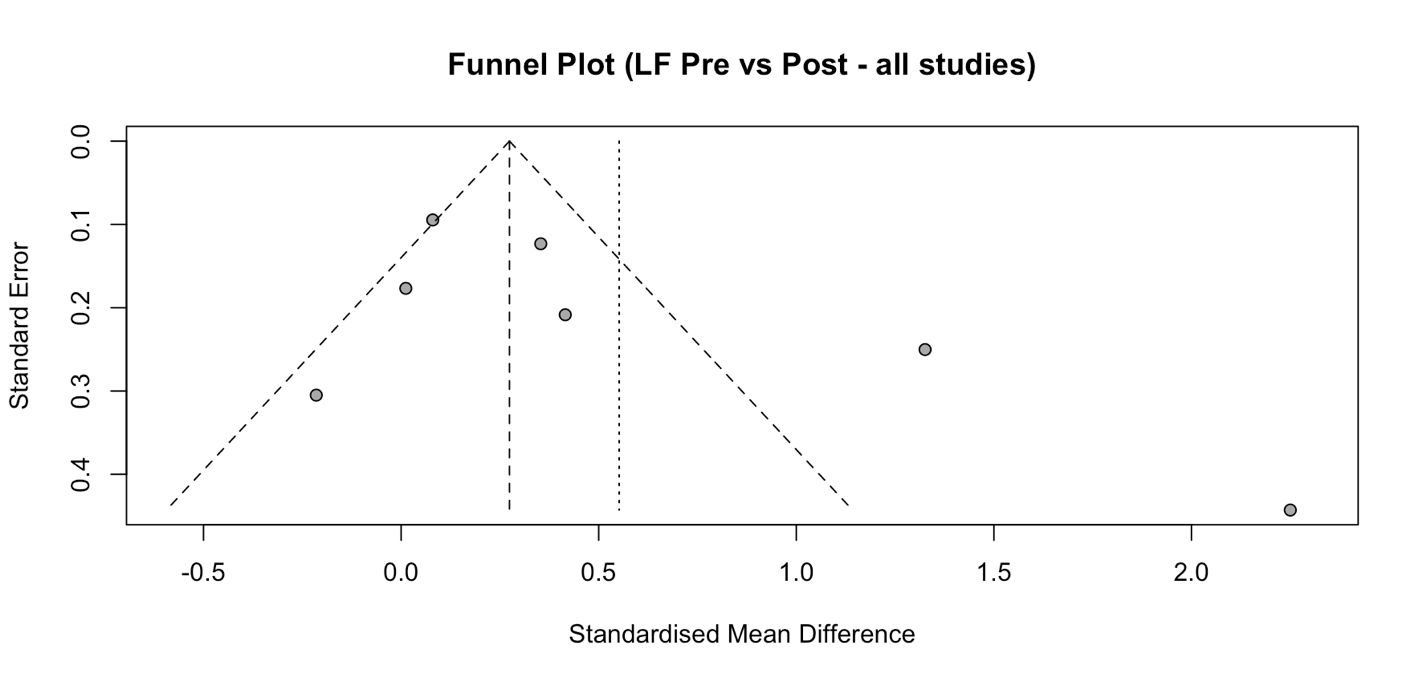


c)


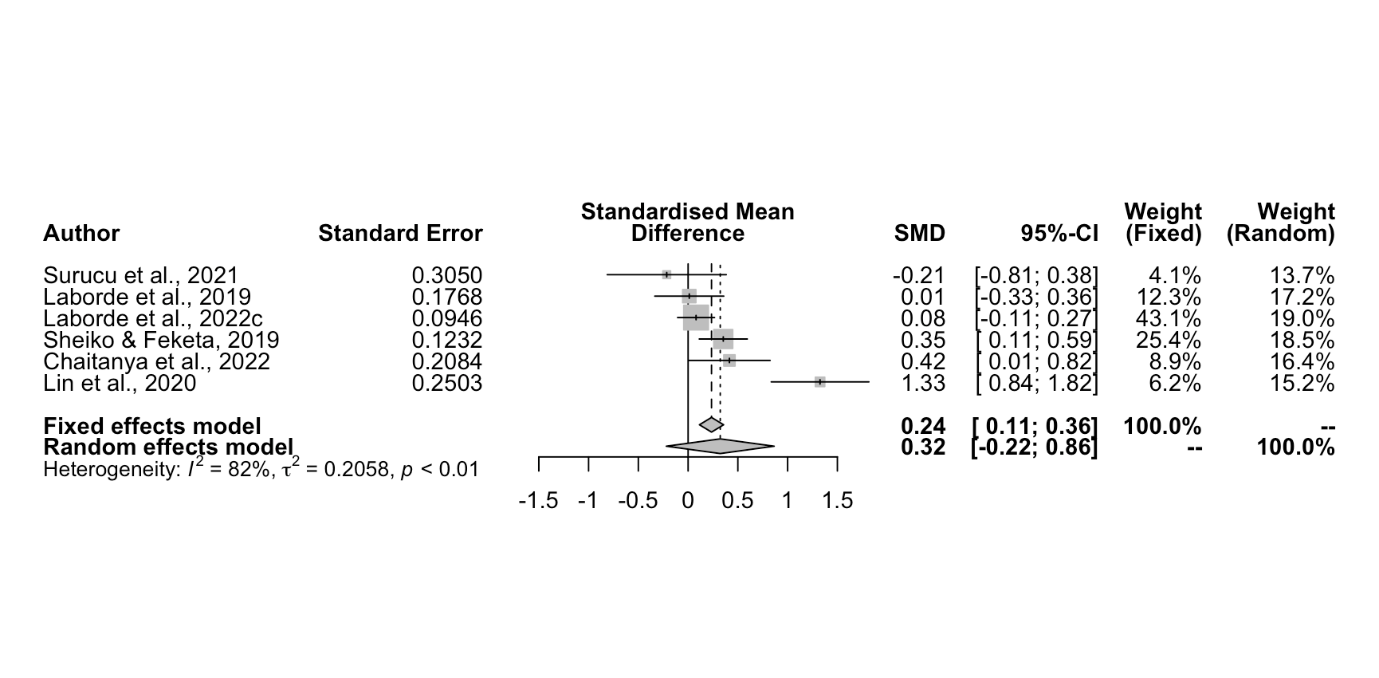


**Supplementary Figure S8.** (a) Forest plot of effect sizes and (b) funnel plot for included studies investigating LF-HRV ratio at baseline (TPRE) and during intervention (TINTERVENTION). (c) Forest plot of effect sizes after removing outliers (TPRE vs TINTERVENTION).

a)


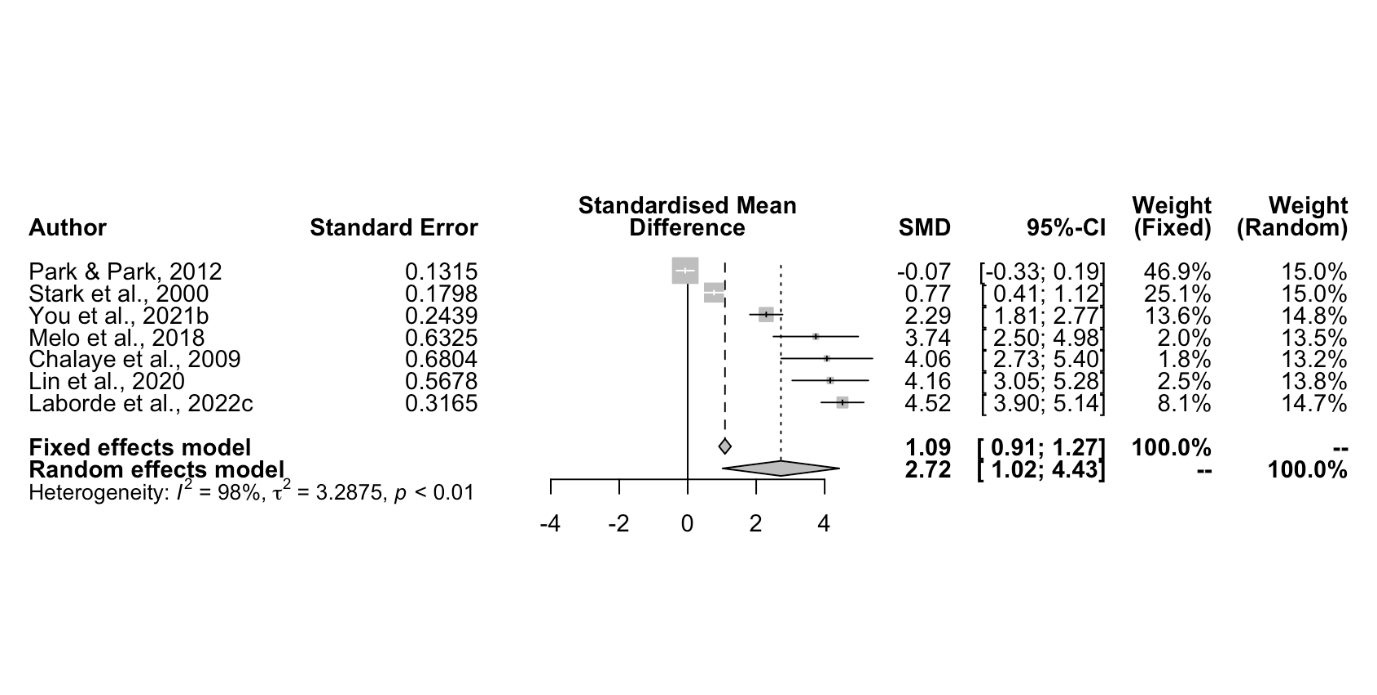


b)


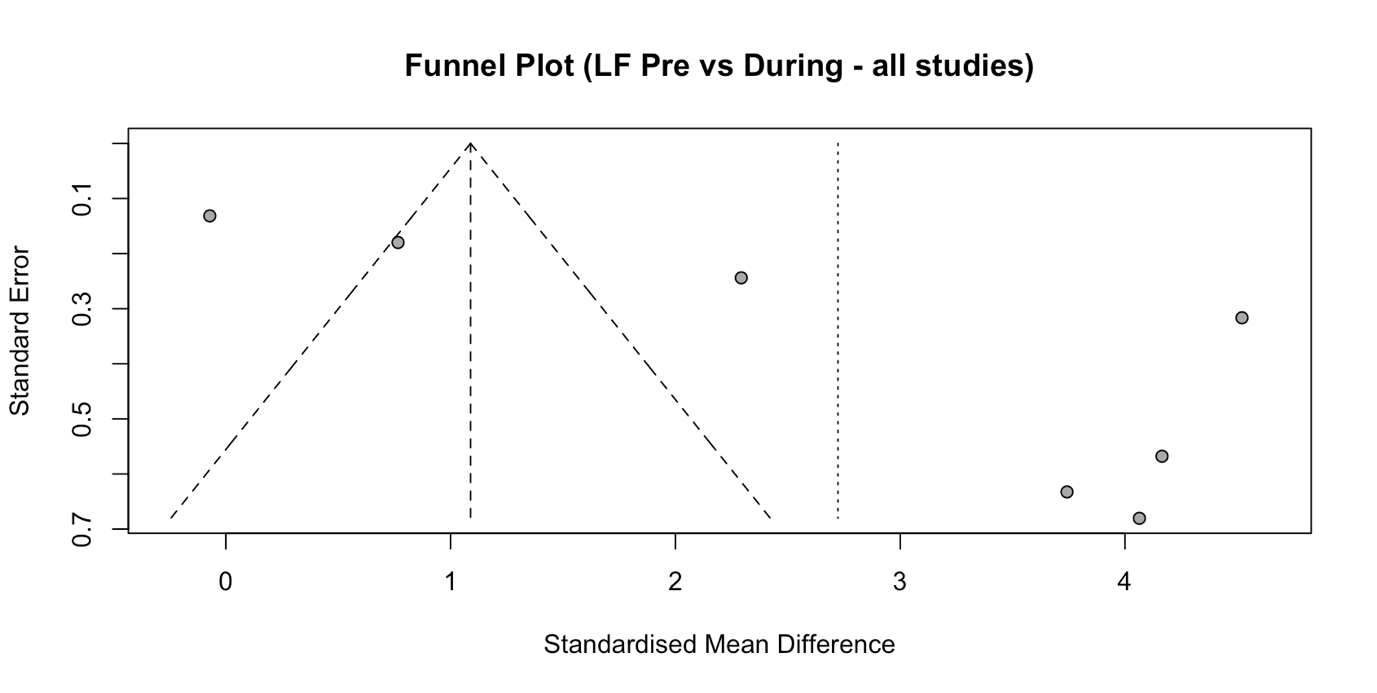


c)


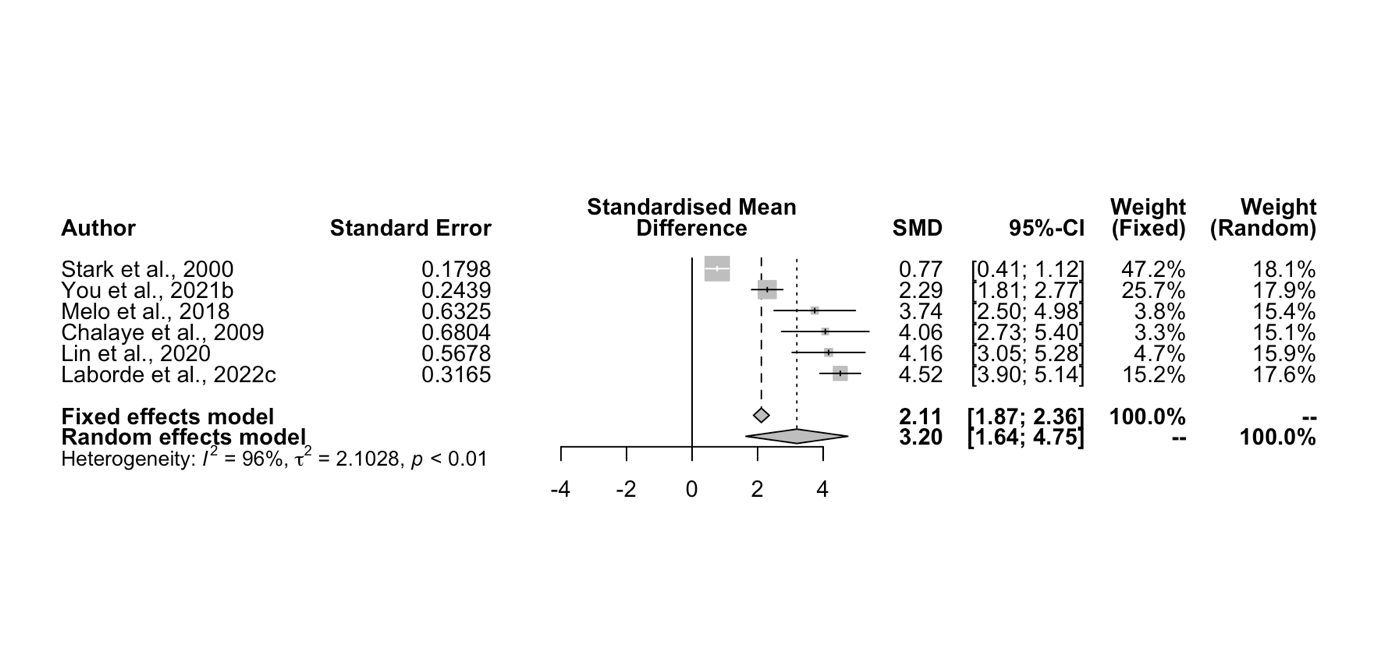


**Supplementary Figure S9**. (a) Forest plot of effect sizes and (b) funnel plot for included studies investigating HF-HRV at baseline (TPRE) and following intervention (TPOST). (c) Forest plot of effect sizes after removing outliers (TPRE vs TPOST).

a)


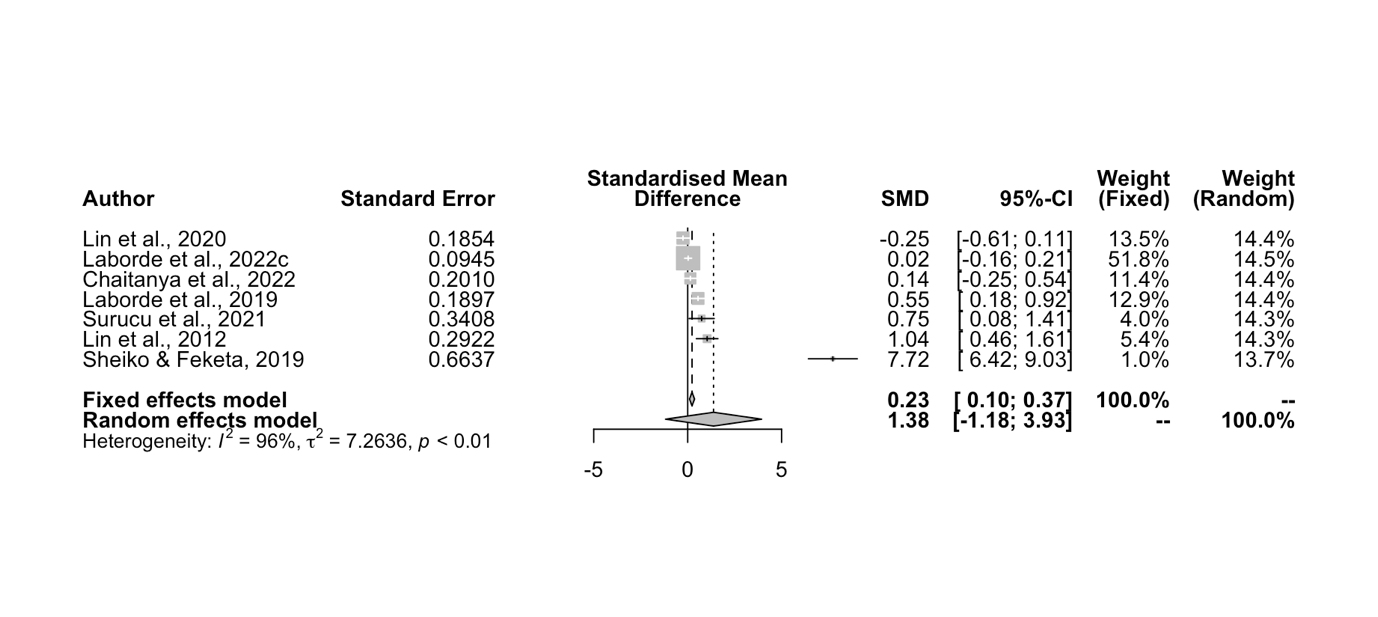


b)


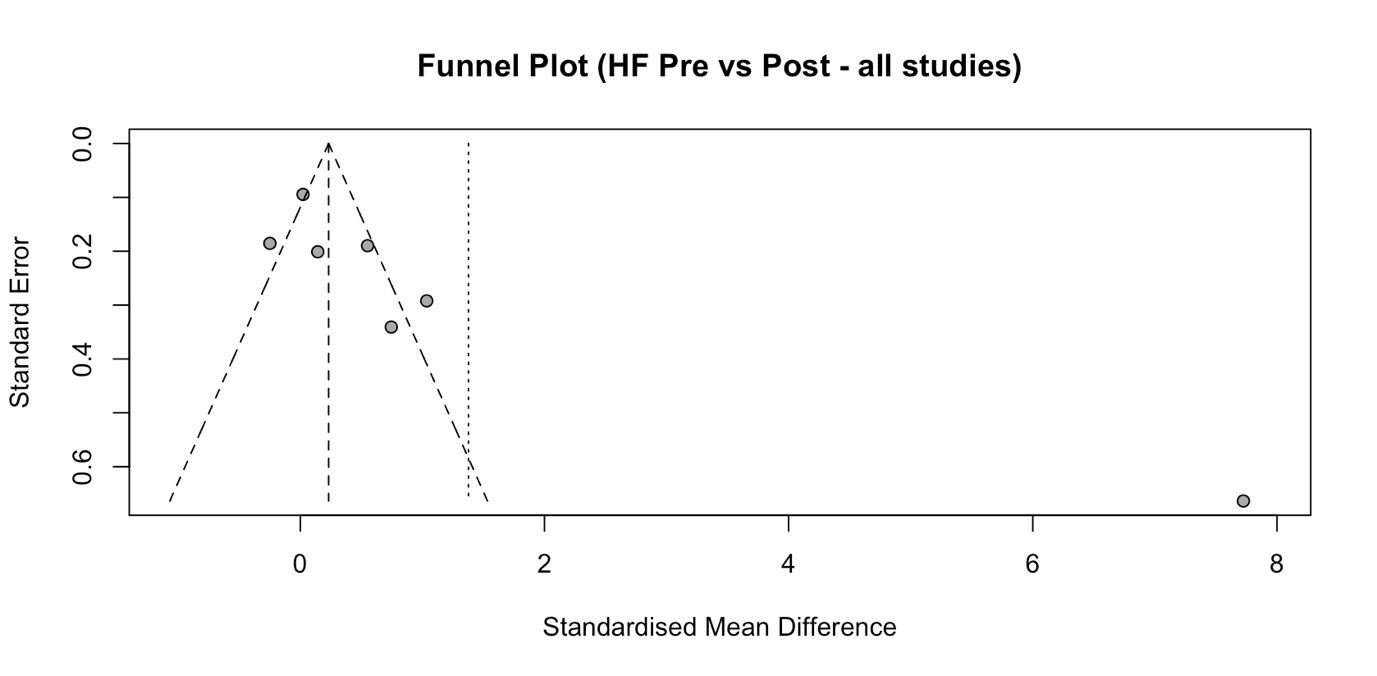


c)


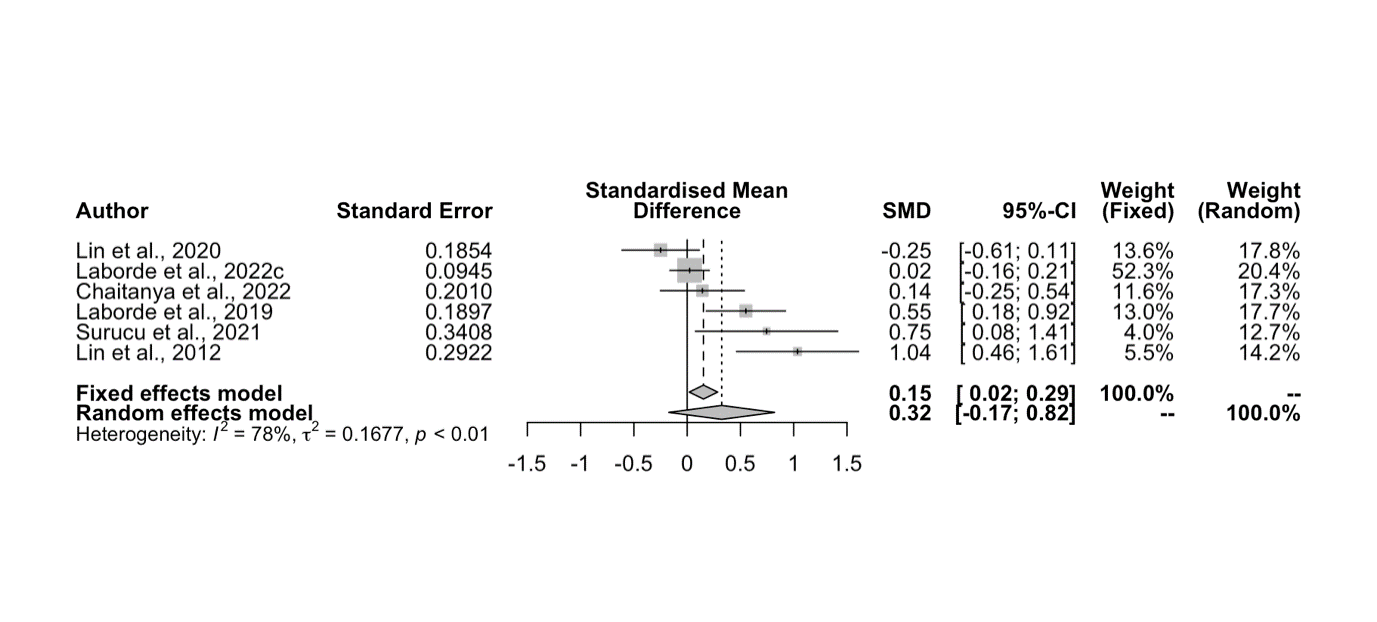


**Supplementary Figure S10**. (a) Forest plot of effect sizes and (b) funnel plot for included studies investigating LF/HF Ratio at baseline (TPRE) and following intervention (TPOST). (c) Forest plot of effect sizes after removing outliers (TPRE vs TPOST).

a)


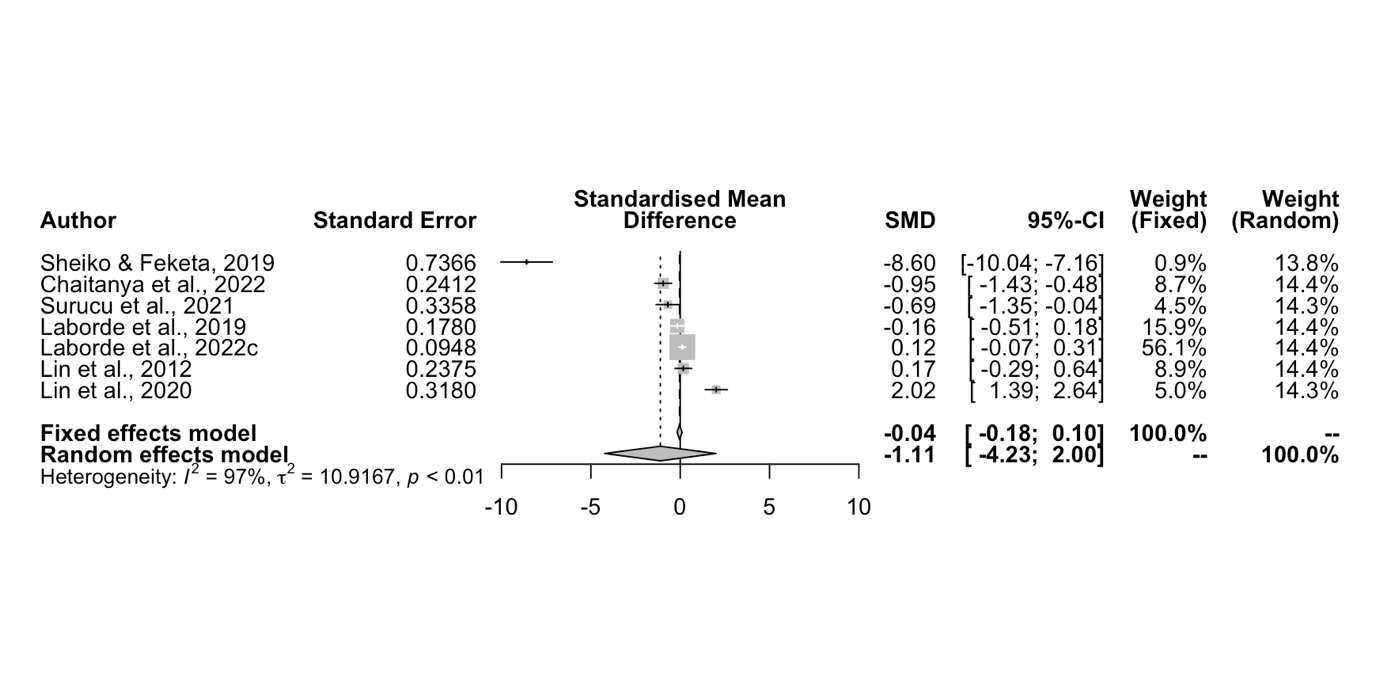


b)


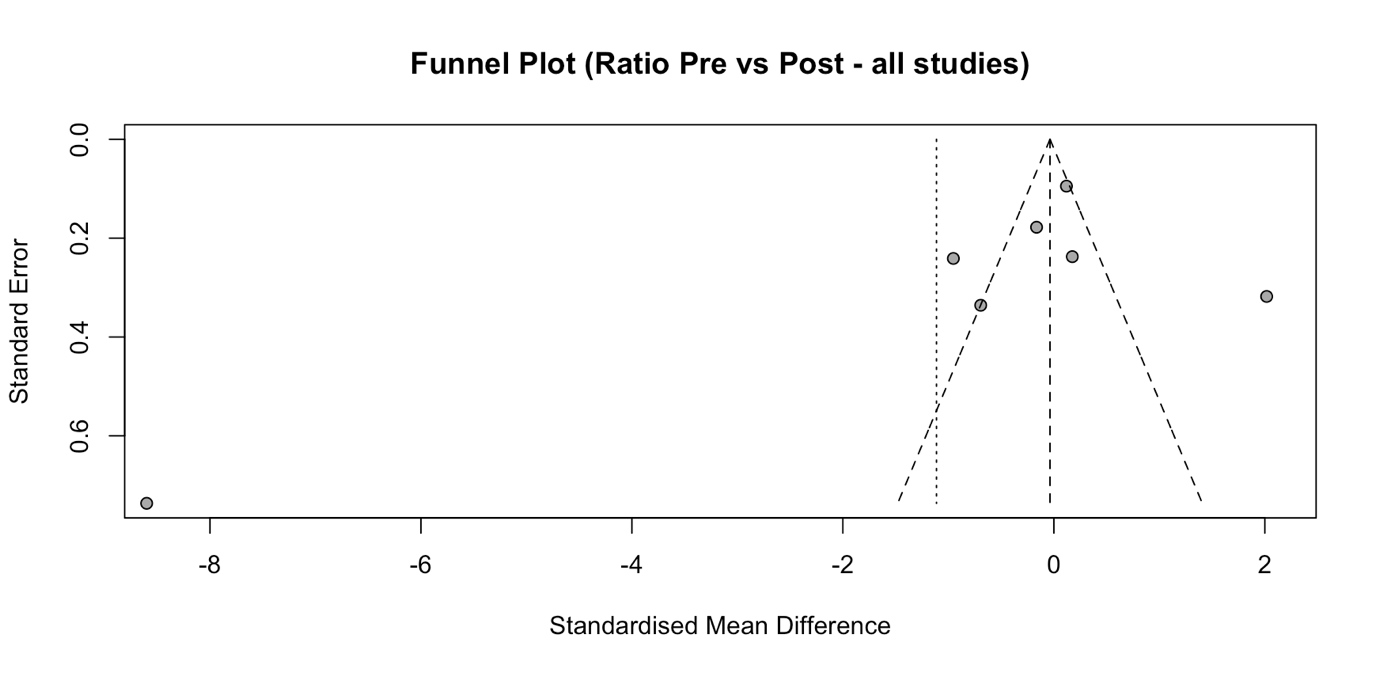


c)


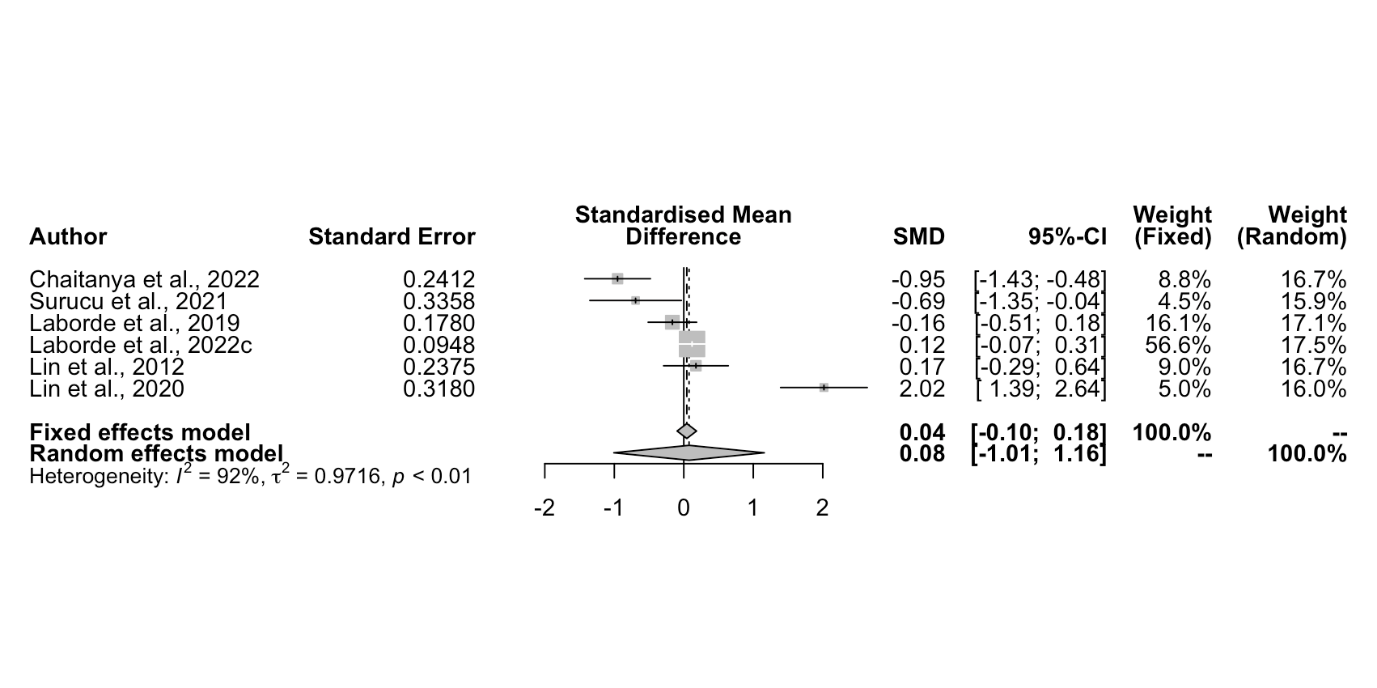


**Supplementary Figure S11**. (a) Forest plot of effect sizes and (b) funnel plot for included studies investigating SBP at baseline (TPRE) and following intervention (TPOST).

a)


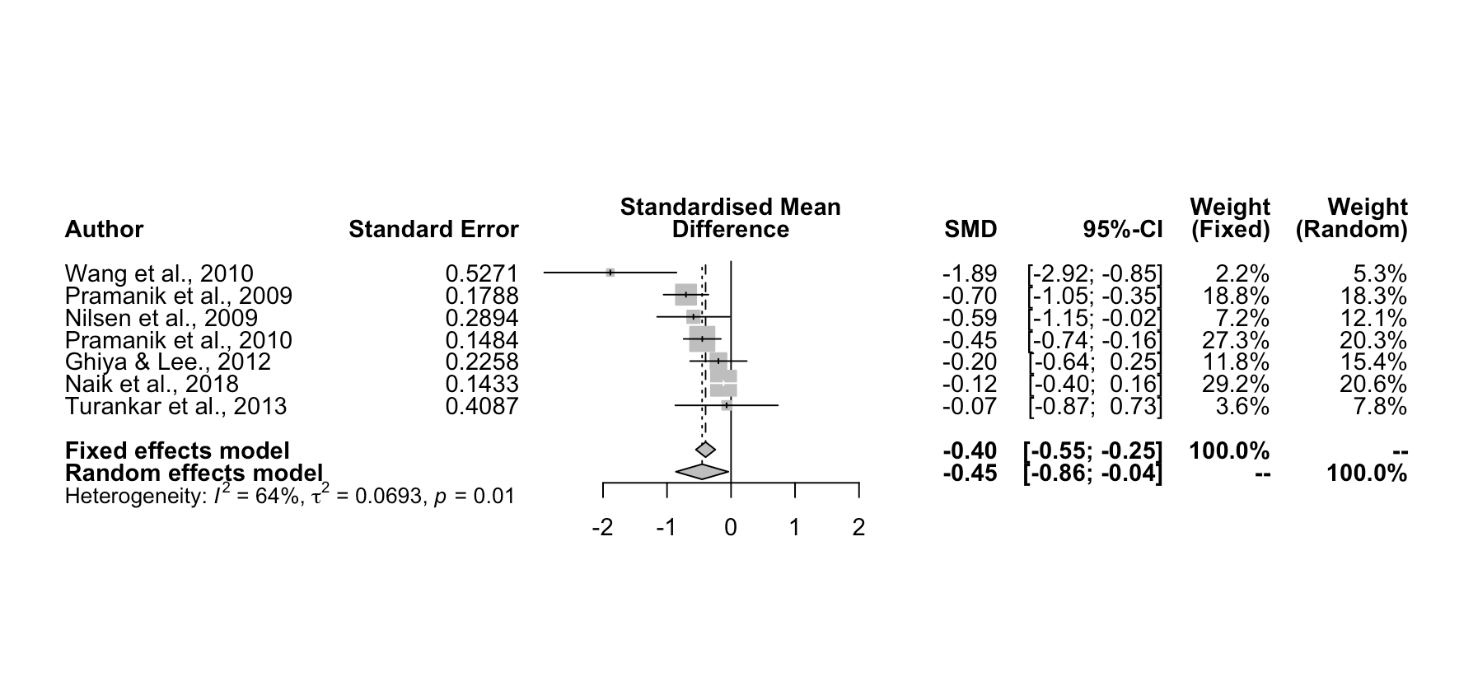


b)


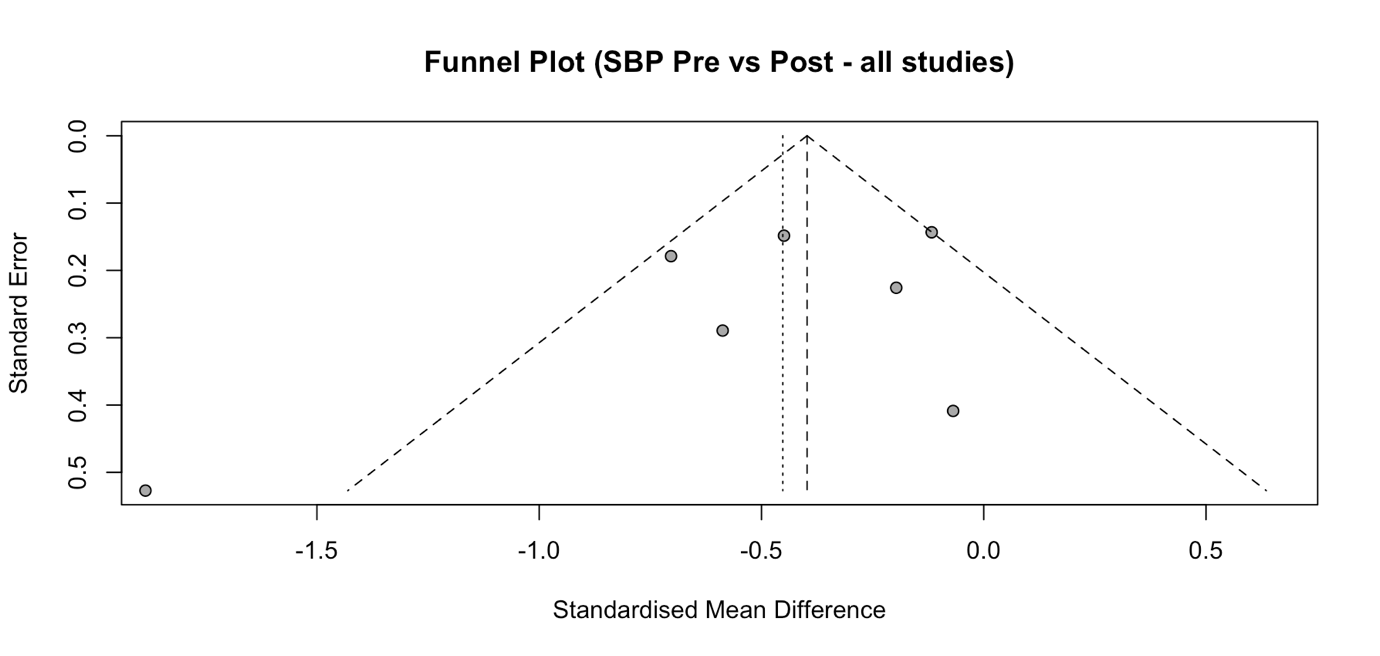


**Supplementary Figure S12**. (a) Forest plot of effect sizes and (b) funnel plot for included studies investigating SBP at baseline (TPRE) and during intervention (TINTERVENTION).

a)


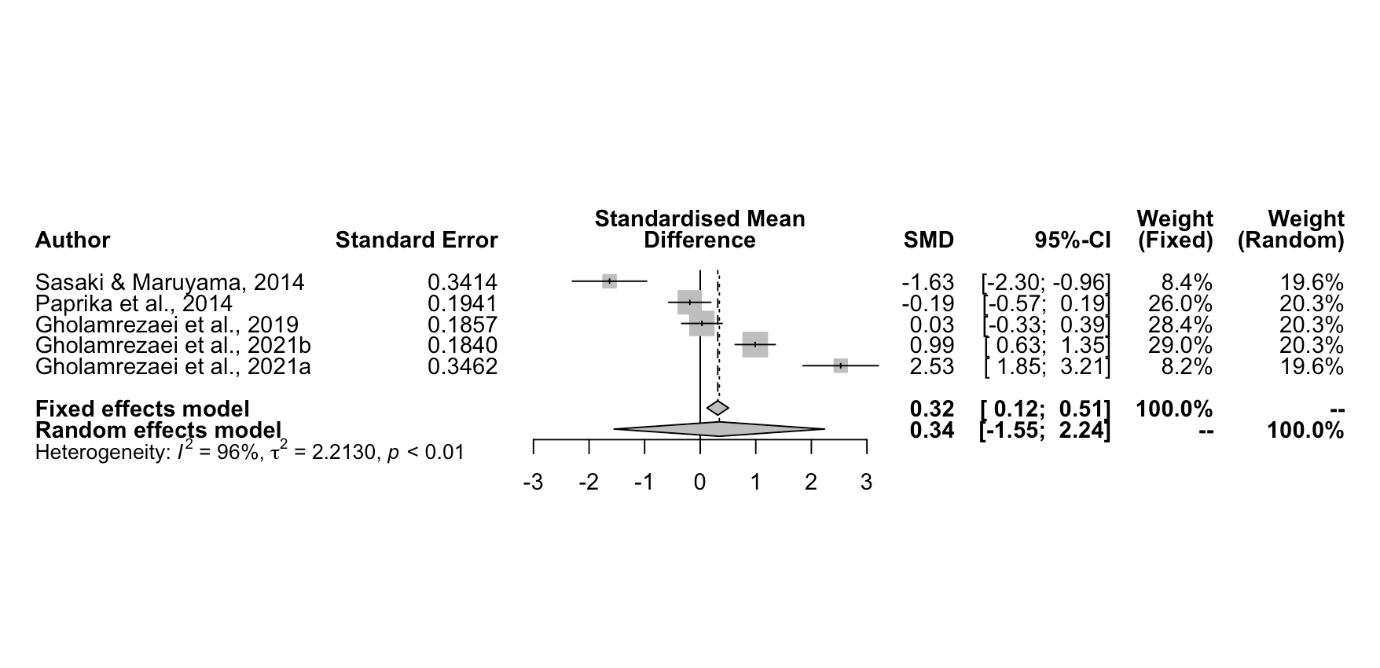


b)


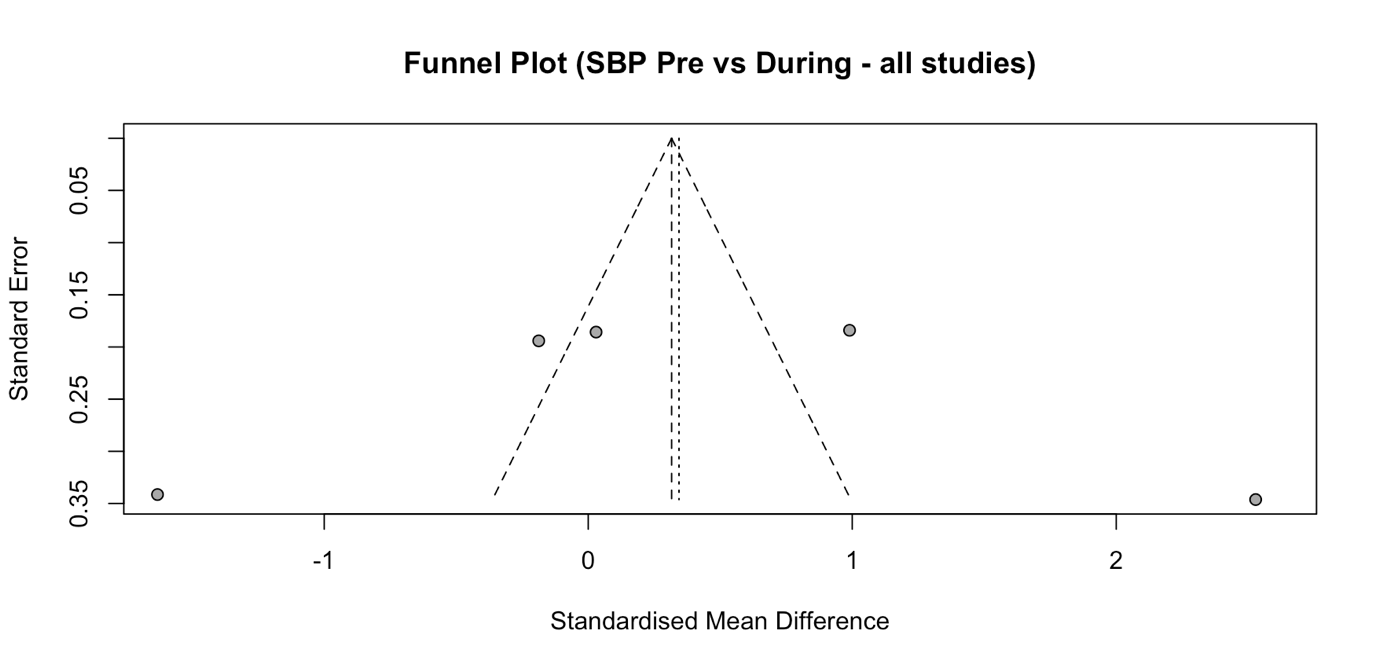


**Supplementary Figure S13**. (a) Forest plot of effect sizes and (b) funnel plot for included studies investigating DBP at baseline (TPRE) and following intervention (TPOST).

a)


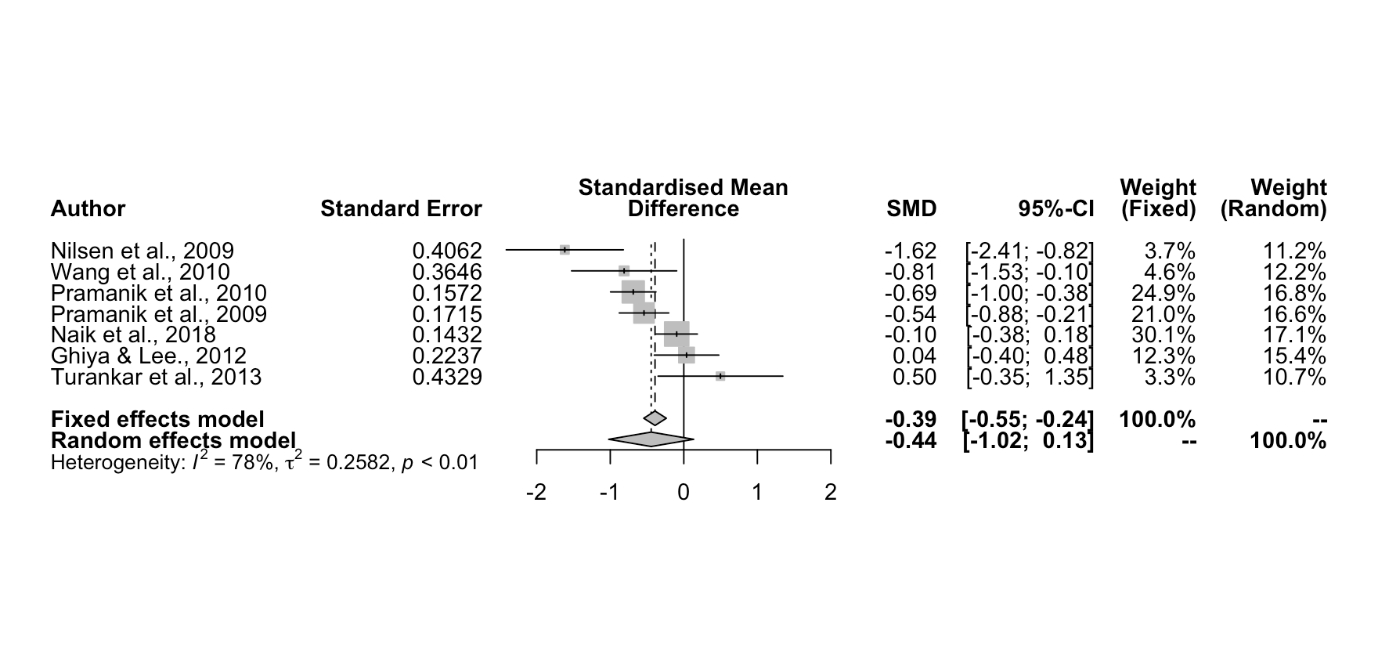


b)

**
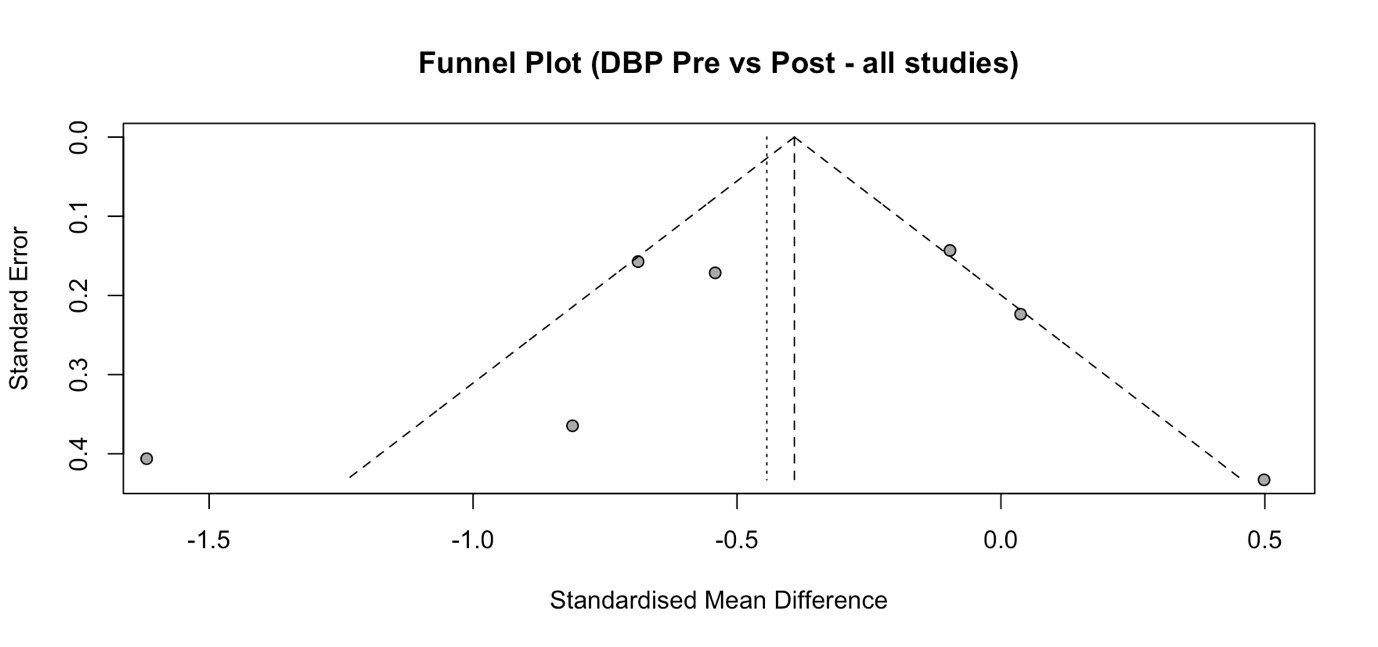
**

**Supplementary Figure S14**. (a) Forest plot of effect sizes and (b) funnel plot for included studies investigating DBP at baseline (TPRE) and during intervention (TINTERVENTION).

a)


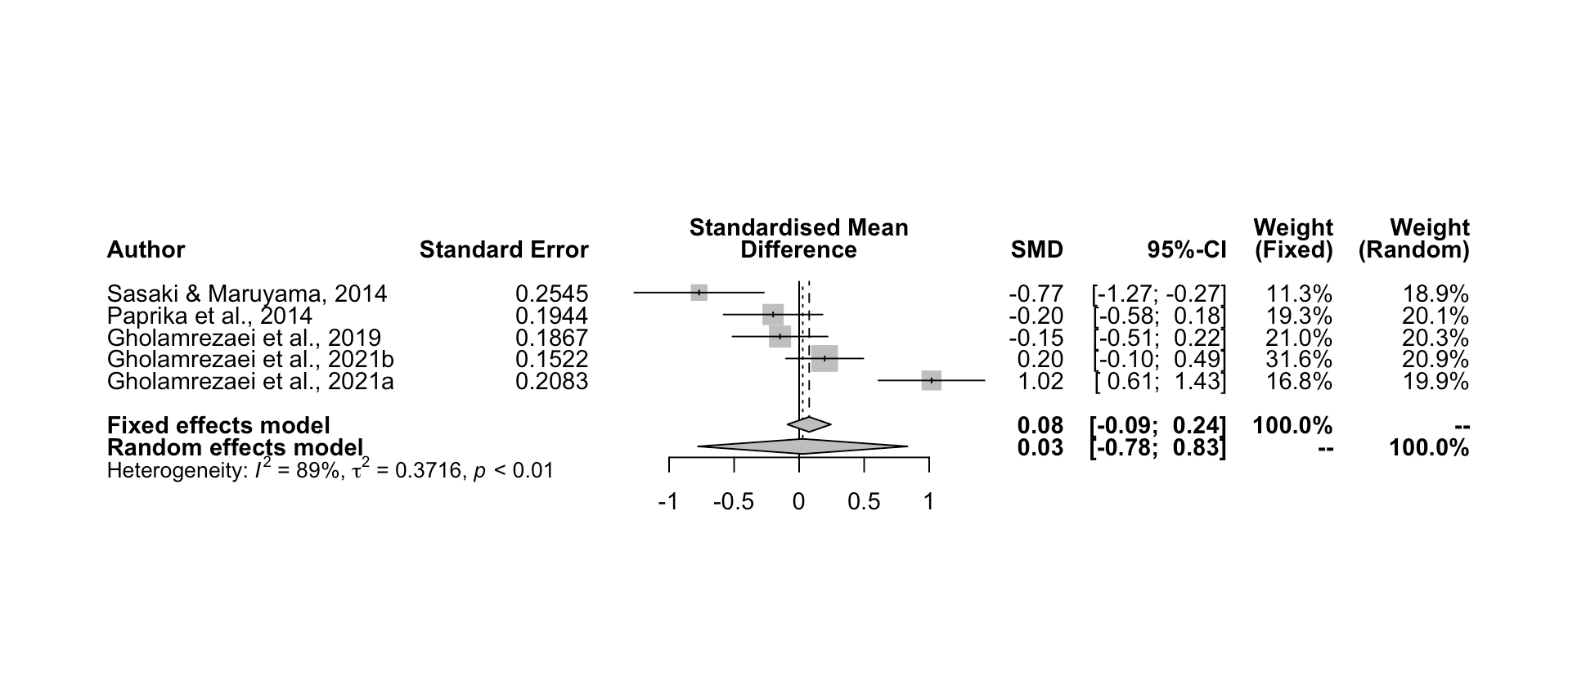


b)

**
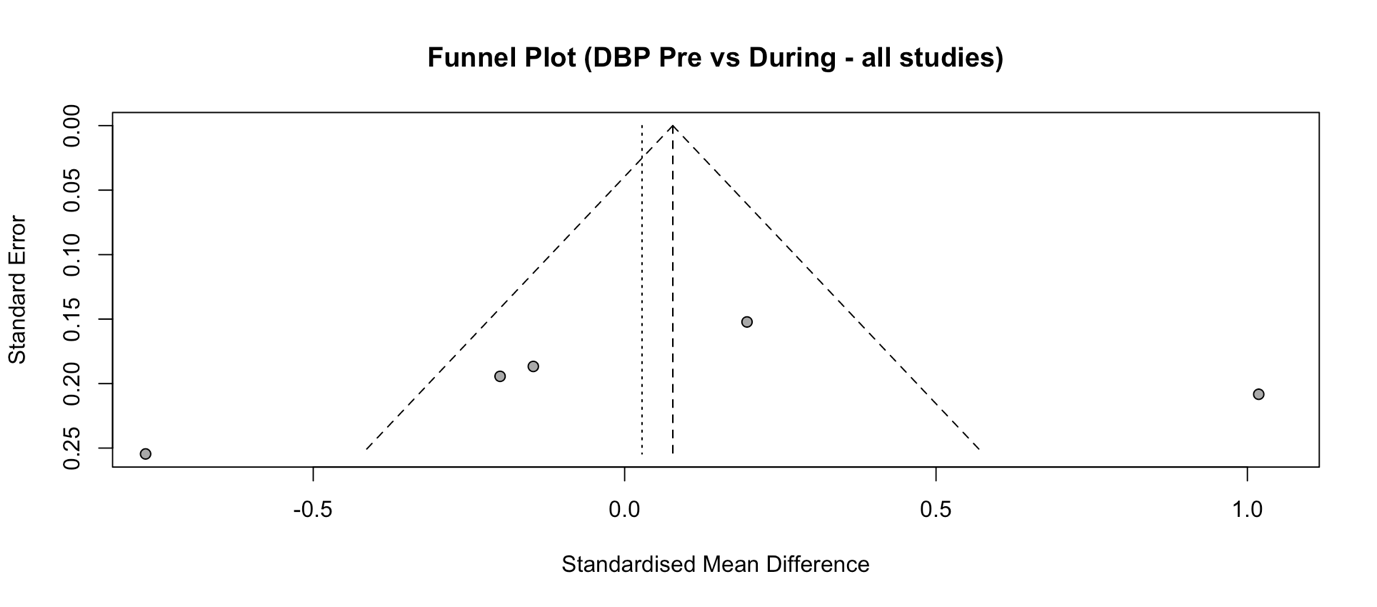
**

**Supplementary Figure S15**. (a) Forest plot of effect sizes and (b) funnel plot for included studies investigating emotional responses at baseline (TPRE) and following intervention (TPOST). (c) Forest plot of effect sizes after removing outliers (TPRE vs TPOST).

a)


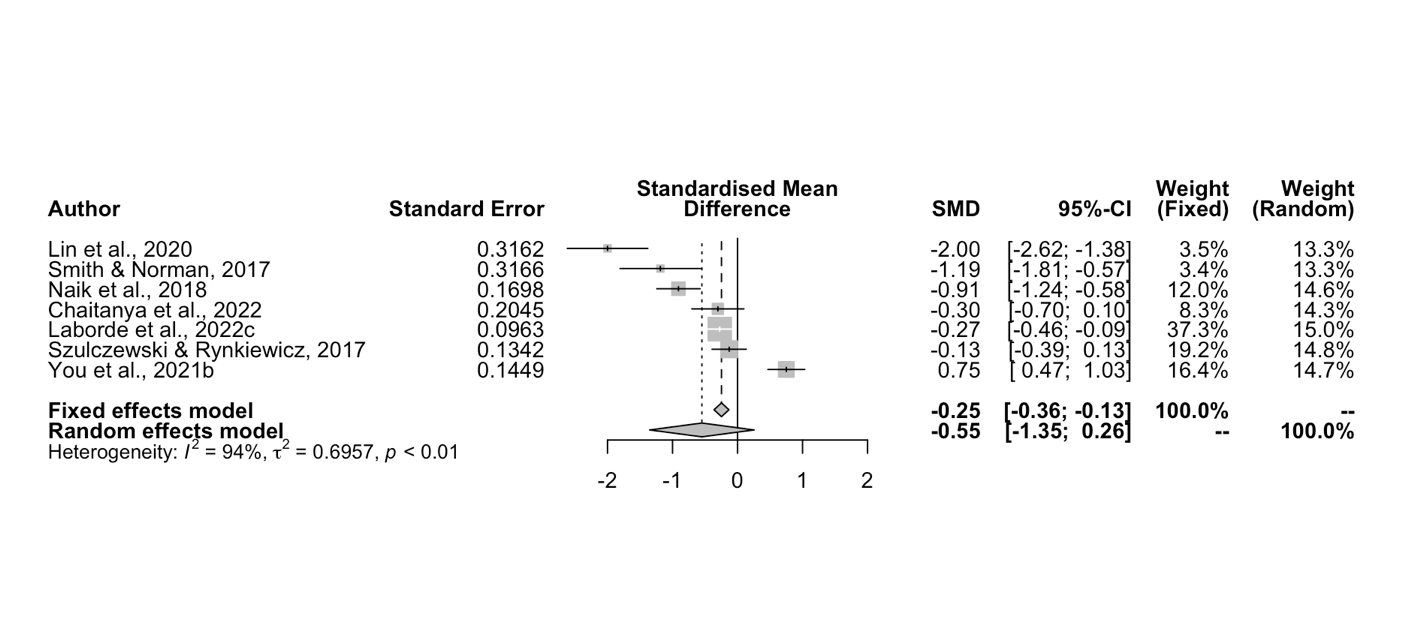


b)

**
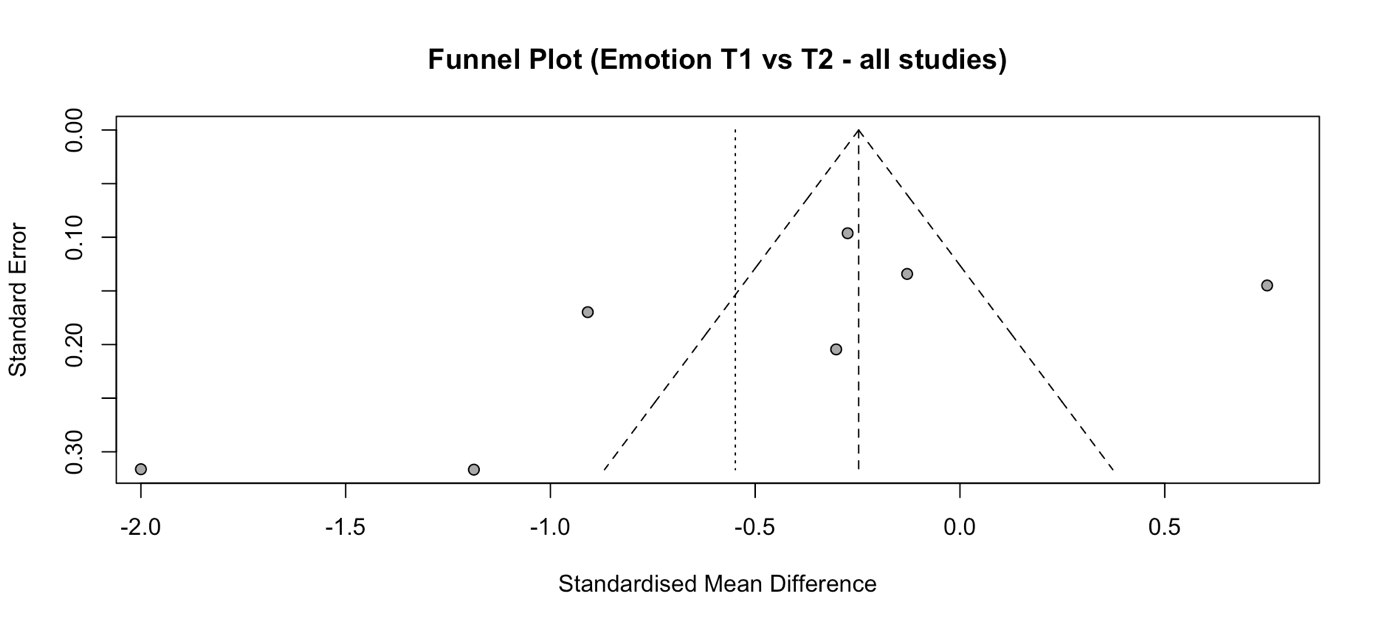
**

c)


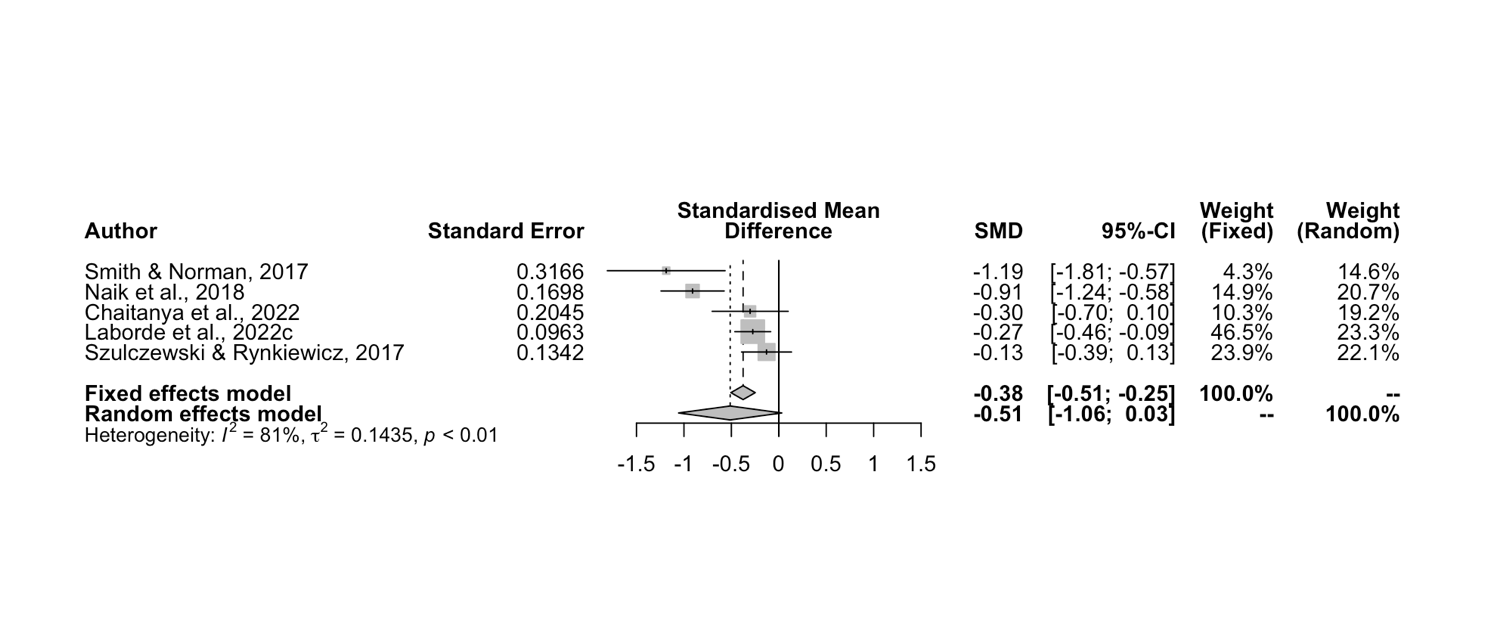

Supplement: MOESM1 [file 26587328]
